# Supplementary material for: Metabolic Profiles are Principally Different between Cancers of the Liver, Pancreas and Breast
Source: PubMed Central journal article supplement — Int J Biol Sci. 2014 Aug 30;10(9):966–72. doi: 10.7150/ijbs.9810 (PMC4159687; doi:10.7150/ijbs.9810), 2014-08-30
Supplement: ijbsv10p0966s1.pdf [file ijbsv10p0966s1.pdf]

## Supplementary Text

### **Metabolic profiles are principally different between cancers of the liver, pancreas and breast.**

Anuradha Budhu<sup>1\*</sup>, Atsushi Terunuma<sup>2</sup>, Geng Zhang<sup>3†</sup>, S. Perwez Hussain<sup>3</sup>, Stefan Ambs<sup>2</sup>, Xin Wei Wang<sup>1</sup>.

<sup>1</sup>Liver Carcinogenesis Section, <sup>2</sup>Molecular Epidemiology Section, <sup>3</sup>Pancreatic Cancer Unit, Laboratory of Human Carcinogenesis, Center for Cancer Research, National Cancer Institute, Bethesda, MD, USA.

†Current address: Institute of Biophysics, Chinese Academy of Sciences, Beijing, China.

\*Corresponding author: A. Budhu, Laboratory of Human Carcinogenesis, National Cancer Institute, NIH, 37 Convent Drive, Building 37, Room 3050A, Bethesda, MD 20892, USA;  
Email: budhua@mail.nih.gov

## **Supplemental Figure legends**

**Supplemental Figure 1. Metabolites patterns can distinguish tumor or nontumor specimens among cancers.** (a) A principal component analysis plot is shown comparing the metabolite status of tumor specimens or (b) nontumor specimens among patients with liver, pancreas and breast cancer.

**Supplemental Figure 2. Tumor-specific metabolite can distinguish cancer types.** (a) A principal component analysis plot is shown comparing the metabolite status of liver, pancreas or breast specimens based on tumor-specific metabolites.

**Supplemental Figure 3. Metabolites patterns can distinguish cancer types.** (a) A VENN diagram is presented for metabolites that were yielded among liver, pancreas or breast specimens. (b) VENN diagrams are presented comparing tumor-specific metabolite abundance and cancer-specific metabolite yield for each cancer type.

A.

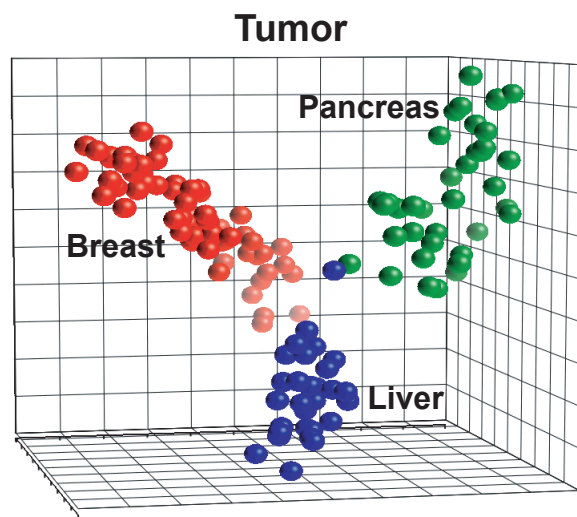

B.

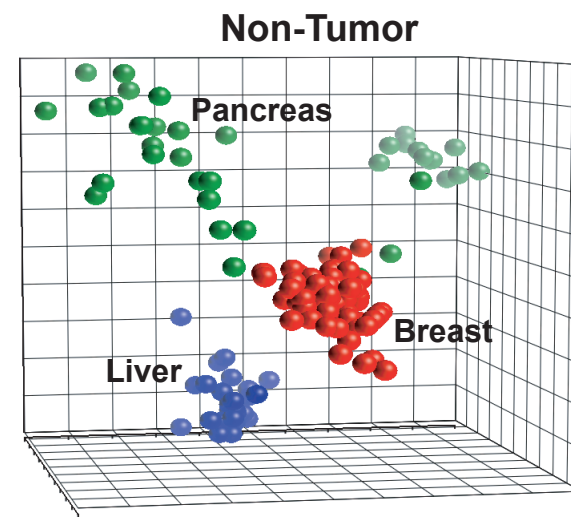

A.

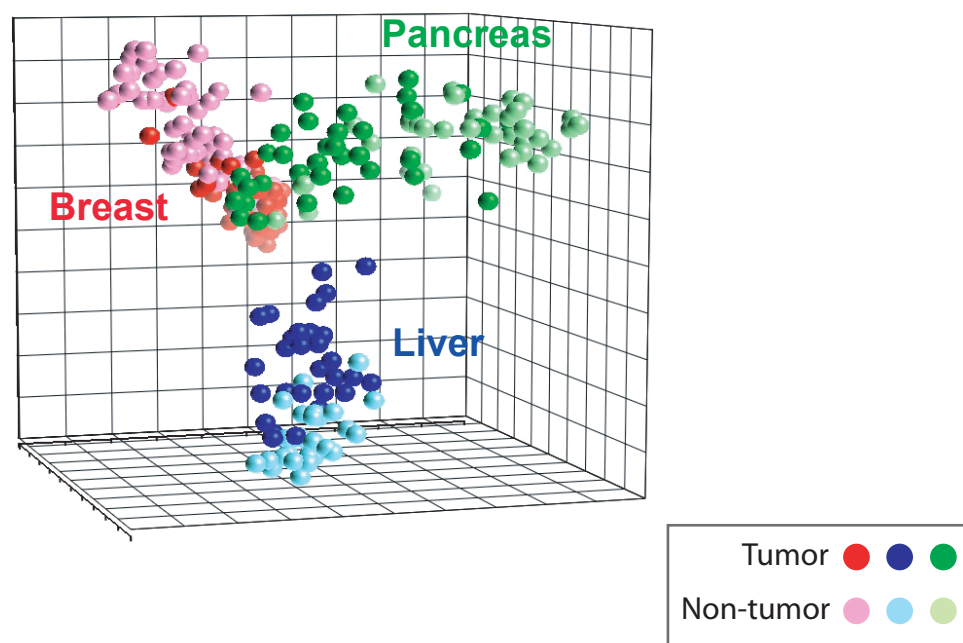

**A.**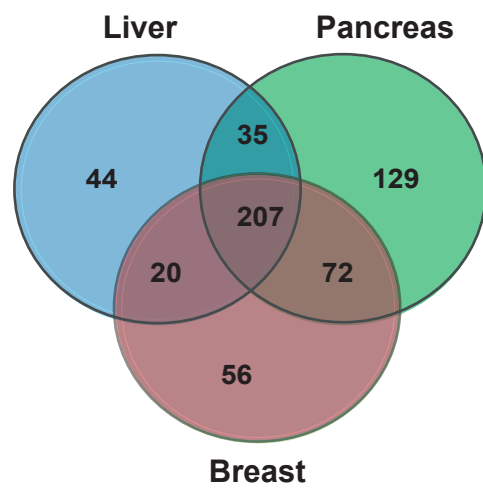**B.**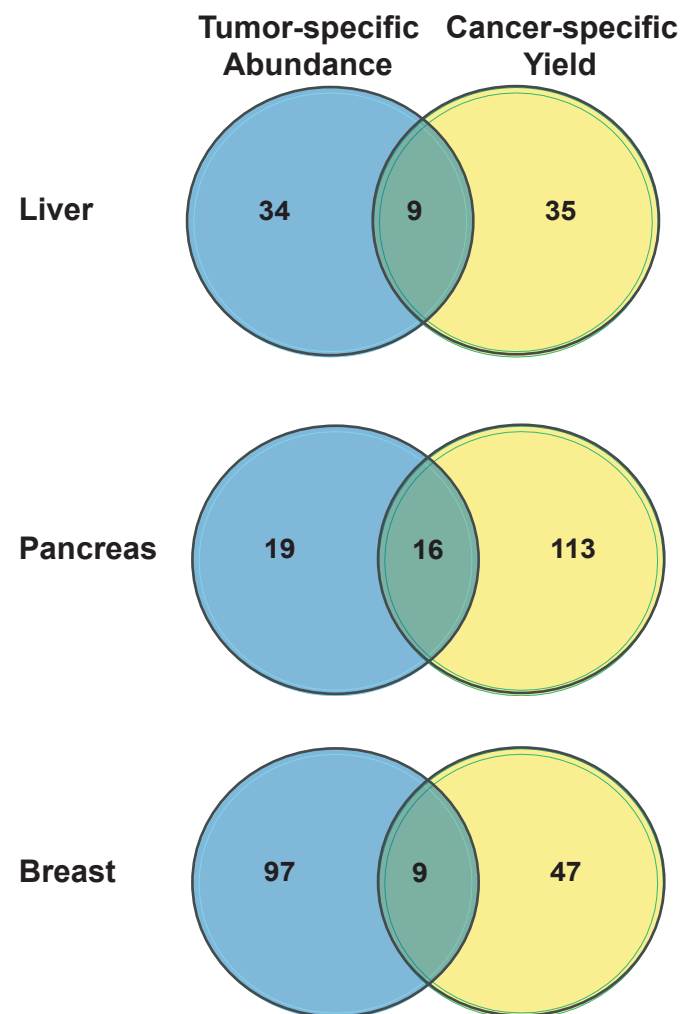

**Supplemental Table 1: Clinical Characteristics of Patients at Diagnosis**

|                               | <b>HCC (n=30)</b>        | <b>Pancreas (n=38)</b> | <b>Breast (n=65)</b> |                                                      |                                                    |                                                         |
|-------------------------------|--------------------------|------------------------|----------------------|------------------------------------------------------|----------------------------------------------------|---------------------------------------------------------|
| <b>Clinical Variable</b>      | <b>Value<sup>a</sup></b> | <b>Value</b>           | <b>Value</b>         | <b>P-value<sup>b</sup><br/>(HCC vs<br/>Pancreas)</b> | <b>P-value<sup>b</sup><br/>(HCC vs<br/>Breast)</b> | <b>P-value<sup>b</sup><br/>(Pancreas vs<br/>Breast)</b> |
| <b><i>Gender</i></b>          |                          |                        |                      |                                                      |                                                    |                                                         |
| Male; Female                  | 25 (83); 5               | 10 (26); 13            | 0; 65 (100)          | <b>0.0035</b>                                        | <b>0.0001</b>                                      | <b>0.0001</b>                                           |
| <b><i>Age--yr</i></b>         |                          |                        |                      |                                                      |                                                    |                                                         |
| Median (Range)                | 49 (27-77)               | 69 (38-82)             | 51 (30-93)           | <b>&lt;0.0001<sup>c</sup></b>                        | 0.1455 <sup>c</sup>                                | <b>&lt;0.0001<sup>c</sup></b>                           |
| <b><i>TNM Stage</i></b>       |                          |                        |                      |                                                      |                                                    |                                                         |
| I                             | 12 (40)                  | 5 (13)                 | 6 (10)               | <b>0.0037</b>                                        | <b>0.0005</b>                                      | <b>0.0339</b>                                           |
| II                            | 8 (27)                   | 27 (71)                | 44 (73)              |                                                      |                                                    |                                                         |
| III                           | 10 (33)                  | 3 (8)                  | 15 (25)              |                                                      |                                                    |                                                         |
| IV                            | 0                        | 3(8)                   | 0                    |                                                      |                                                    |                                                         |
| <b><i>Survival months</i></b> |                          |                        |                      |                                                      |                                                    |                                                         |
| Median (Range)                | 53.3 (3.8-64.2)          | 11 (1.2-70.8)          | 50 (0-148)           |                                                      |                                                    |                                                         |
| Events                        | 13                       | 26                     | 30                   |                                                      |                                                    |                                                         |

<sup>a</sup> Each value represents: the number of patients (the % of patients); <sup>b</sup>  $\chi^2$  Test; <sup>c</sup> Unpaired Student's T Test;

Supplemental Table 2: Differentially abundant metabolites in liver cancer

| Metabolite                                 | Super Pathway          | Sub Pathway                                                  | Parametric p-value | Permutation p-value | FC TvsNT     |
|--------------------------------------------|------------------------|--------------------------------------------------------------|--------------------|---------------------|--------------|
| <b>2-aminobutyrate</b>                     | Amino acid             | Butanoate metabolism                                         | <0.0001            | < 1e-07             | <b>0.50</b>  |
| cysteine                                   | Amino acid             | Cysteine, methionine, SAM, taurine metabolism                | <0.0001            | 0.000               | <b>0.31</b>  |
| cystine                                    | Amino acid             | Cysteine, methionine, SAM, taurine metabolism                | 0.005              | 0.006               | <b>0.33</b>  |
| S-adenosylhomocysteine (SAH)               | Amino acid             | Cysteine, methionine, SAM, taurine metabolism                | <0.0001            | < 1e-07             | <b>0.44</b>  |
| <b>gamma-aminobutyrate (GABA)</b>          | Amino acid             | Glutamate metabolism                                         | <0.0001            | < 1e-07             | <b>0.28</b>  |
| <b>pyroglutamine*</b>                      | Amino acid             | Glutamate metabolism                                         | <0.0001            | < 1e-07             | <b>0.51</b>  |
| <b>urocanate</b>                           | Amino acid             | Histidine metabolism                                         | 0.002              | 0.001               | <b>2.27</b>  |
| <b>methylglutaryl carnitine</b>            | Amino acid             | Lysine metabolism                                            | 0.001              | 0.001               | <b>0.38</b>  |
| <b>5-methylthioadenosine (MTA)</b>         | Amino acid             | Polyamine metabolism                                         | <0.0001            | < 1e-07             | <b>3.45</b>  |
| <b>isobutyryl carnitine</b>                | Amino acid             | Valine, leucine and isoleucine metabolism                    | <0.0001            | < 1e-07             | <b>0.28</b>  |
| isovaleryl carnitine                       | Amino acid             | Valine, leucine and isoleucine metabolism                    | 0.005              | 0.008               | <b>0.53</b>  |
| <b>tiglyl carnitine</b>                    | Amino acid             | Valine, leucine and isoleucine metabolism                    | <0.001             | < 1e-07             | <b>0.48</b>  |
| <b>valeryl carnitine</b>                   | Amino acid             | Valine, leucine and isoleucine metabolism                    | <0.0001            | < 1e-07             | <b>3.13</b>  |
| <b>N-acetylmannosamine</b>                 | Carbohydrate           | Aminosugars metabolism                                       | <0.0001            | <0.0001             | <b>0.44</b>  |
| mannose                                    | Carbohydrate           | Fructose, mannose, galactose, starch, and sucrose metabolism | <0.0001            | < 1e-07             | <b>0.46</b>  |
| sorbitol                                   | Carbohydrate           | Fructose, mannose, galactose, starch, and sucrose metabolism | <0.0001            | < 1e-07             | <b>0.31</b>  |
| <b>tagatose</b>                            | Carbohydrate           | Fructose, mannose, galactose, starch, and sucrose metabolism | <0.0001            | < 1e-07             | <b>0.27</b>  |
| glucose                                    | Carbohydrate           | Glycolysis, gluconeogenesis, pyruvate metabolism             | <0.0001            | < 1e-07             | <b>0.28</b>  |
| <b>glucuronate</b>                         | Carbohydrate           | Glycolysis, gluconeogenesis, pyruvate metabolism             | < 1e-07            | < 1e-07             | <b>0.37</b>  |
| <b>6-phosphogluconate</b>                  | Carbohydrate           | Nucleotide sugars, pentose metabolism                        | 0.002              | 0.002               | <b>0.54</b>  |
| <b>ribitol</b>                             | Carbohydrate           | Nucleotide sugars, pentose metabolism                        | <0.0001            | < 1e-07             | <b>0.37</b>  |
| <b>ribose 5-phosphate</b>                  | Carbohydrate           | Nucleotide sugars, pentose metabolism                        | <0.0001            | <0.0001             | <b>0.39</b>  |
| <b>xylitol</b>                             | Carbohydrate           | Nucleotide sugars, pentose metabolism                        | <0.0001            | < 1e-07             | <b>0.32</b>  |
| <b>glucarate (saccharate)</b>              | Cofactors and vitamins | Ascorbate and aldarate metabolism                            | <0.0001            | < 1e-07             | <b>0.48</b>  |
| <b>gulono-1,4-lactone</b>                  | Cofactors and vitamins | Ascorbate and aldarate metabolism                            | <0.0001            | < 1e-07             | <b>0.29</b>  |
| <b>5-methyltetrahydrofolate (5MeTHF)</b>   | Cofactors and vitamins | Folate metabolism                                            | <0.0001            | <0.0001             | <b>0.50</b>  |
| nicotinamide                               | Cofactors and vitamins | Nicotinate and nicotinamide metabolism                       | 0.001              | 0.001               | <b>0.24</b>  |
| <b>nicotinamide riboside*</b>              | Cofactors and vitamins | Nicotinate and nicotinamide metabolism                       | < 1e-07            | <0.0001             | <b>0.47</b>  |
| <b>pyridoxal</b>                           | Cofactors and vitamins | Pyridoxal metabolism                                         | < 1e-07            | < 1e-07             | <b>0.50</b>  |
| <b>flavin adenine dinucleotide (FAD)</b>   | Cofactors and vitamins | Riboflavin metabolism                                        | <0.0001            | < 1e-07             | <b>0.41</b>  |
| riboflavin (Vitamin B2)                    | Cofactors and vitamins | Riboflavin metabolism                                        | <0.0001            | < 1e-07             | <b>0.51</b>  |
| <b>alpha-tocopherol</b>                    | Cofactors and vitamins | Tocopherol metabolism                                        | <0.0001            | <0.0001             | <b>0.32</b>  |
| <b>pyridoxate</b>                          | Cofactors and vitamins | Vitamin B6 metabolism                                        | <0.0001            | < 1e-07             | <b>0.44</b>  |
| fumarate                                   | Energy                 | Krebs cycle                                                  | < 1e-07            | < 1e-07             | <b>0.50</b>  |
| malate                                     | Energy                 | Krebs cycle                                                  | < 1e-07            | < 1e-07             | <b>0.42</b>  |
| <b>glycochenodeoxycholate</b>              | Lipid                  | Bile acid metabolism                                         | 0.004              | 0.004               | <b>0.37</b>  |
| <b>glycocholate</b>                        | Lipid                  | Bile acid metabolism                                         | 0.001              | 0.001               | <b>0.25</b>  |
| <b>glycoursodeoxycholate</b>               | Lipid                  | Bile acid metabolism                                         | <0.0001            | <0.0001             | <b>0.37</b>  |
| <b>2-methylmalonyl carnitine</b>           | Lipid                  | Carnitine metabolism                                         | <0.0001            | <0.0001             | <b>1.96</b>  |
| butyryl carnitine                          | Lipid                  | Carnitine metabolism                                         | < 1e-07            | < 1e-07             | <b>13.70</b> |
| deoxycarnitine                             | Lipid                  | Carnitine metabolism                                         | <0.0001            | < 1e-07             | <b>2.08</b>  |
| <b>glutaroyl carnitine</b>                 | Lipid                  | Carnitine metabolism                                         | <0.0001            | < 1e-07             | <b>0.40</b>  |
| hexanoyl carnitine                         | Lipid                  | Carnitine metabolism                                         | <0.0001            | < 1e-07             | <b>4.35</b>  |
| palmitoyl carnitine                        | Lipid                  | Carnitine metabolism                                         | <0.0001            | < 1e-07             | <b>3.13</b>  |
| stearoyl carnitine                         | Lipid                  | Carnitine metabolism                                         | 0.003              | 0.004               | <b>3.03</b>  |
| docosapentaenoate (n3 DPA; 22:5n3)         | Lipid                  | Essential fatty acid                                         | <0.0001            | 0.001               | <b>0.52</b>  |
| linolenate [alpha or gamma; (18:3n3 or 6)] | Lipid                  | Essential fatty acid                                         | <0.0001            | < 1e-07             | <b>0.36</b>  |
| <b>choline</b>                             | Lipid                  | Glycerolipid metabolism                                      | <0.0001            | 0.001               | <b>2.13</b>  |
| glycerol                                   | Lipid                  | Glycerolipid metabolism                                      | <0.0001            | <0.0001             | <b>0.44</b>  |

|                                            |             |                                                      |         |         |             |
|--------------------------------------------|-------------|------------------------------------------------------|---------|---------|-------------|
| glycerophosphorylcholine (GPC)             | Lipid       | Glycerolipid metabolism                              | <0.0001 | < 1e-07 | <b>0.38</b> |
| phosphoethanolamine                        | Lipid       | Glycerolipid metabolism                              | <0.0001 | < 1e-07 | <b>2.13</b> |
| <b>phosphopantetheine</b>                  | Lipid       | Glycerolipid metabolism                              | 0.006   | 0.003   | <b>0.54</b> |
| docosadienoate (22:2n6)                    | Lipid       | Long chain fatty acid                                | <0.0001 | <0.0001 | <b>2.08</b> |
| docosapentaenoate (n6 DPA, 22:5n6)         | Lipid       | Long chain fatty acid                                | <0.0001 | <0.0001 | <b>2.17</b> |
| <b>7-beta-hydroxycholesterol</b>           | Lipid       | Sterol/Steroid                                       | <0.0001 | 0.000   | <b>2.08</b> |
| xanthosine                                 | Nucleotide  | Purine metabolism, (hypo)xanthine/inosine containing | < 1e-07 | < 1e-07 | <b>0.18</b> |
| <b>adenine</b>                             | Nucleotide  | Purine metabolism, adenine containing                | >0.0001 | >0.0001 | <b>2.50</b> |
| <b>adenosine 2'-monophosphate (2'-AMP)</b> | Nucleotide  | Purine metabolism, adenine containing                | < 1e-07 | < 1e-07 | <b>0.39</b> |
| <b>adenosine 3',5'-diphosphate</b>         | Nucleotide  | Purine metabolism, adenine containing                | >0.0001 | < 1e-07 | <b>0.37</b> |
| <b>adenosine 3'-monophosphate (3'-AMP)</b> | Nucleotide  | Purine metabolism, adenine containing                | >0.0001 | < 1e-07 | <b>0.39</b> |
| adenosine 5'-monophosphate (AMP)           | Nucleotide  | Purine metabolism, adenine containing                | >0.0001 | >0.0001 | <b>0.30</b> |
| urate                                      | Nucleotide  | Purine metabolism, urate metabolism                  | >0.0001 | < 1e-07 | <b>0.47</b> |
| 5,6-dihydrouracil                          | Nucleotide  | Pyrimidine metabolism, uracil containing             | >0.0001 | < 1e-07 | <b>3.57</b> |
| beta-alanine                               | Nucleotide  | Pyrimidine metabolism, uracil containing             | >0.0001 | < 1e-07 | <b>0.48</b> |
| gamma-glutamylglutamate                    | Peptide     | g-glutamyl                                           | >0.0001 | >0.0001 | <b>0.27</b> |
| <b>gamma-glutamylglutamine</b>             | Peptide     | g-glutamyl                                           | 0.002   | 0.003   | <b>0.30</b> |
| <b>gamma-glutamylmethionine*</b>           | Peptide     | g-glutamyl                                           | >0.0001 | < 1e-07 | <b>0.42</b> |
| <b>gamma-glutamyltyrosine</b>              | Peptide     | g-glutamyl                                           | < 1e-07 | < 1e-07 | <b>0.53</b> |
| <b>VGAHAGEYGAELER*</b>                     | Peptide     | Polypeptide                                          | < 1e-07 | < 1e-07 | <b>0.23</b> |
| <b>hippurate</b>                           | Xenobiotics | Benzoate metabolism                                  | >0.0001 | >0.0001 | <b>0.41</b> |
| glycerol 2-phosphate                       | Xenobiotics | Chemical                                             | < 1e-07 | < 1e-07 | <b>0.25</b> |
| <b>erythritol</b>                          | Xenobiotics | Sugar, sugar substitute, starch                      | >0.0001 | < 1e-07 | <b>0.47</b> |
| <b>galacturonate</b>                       | Xenobiotics | Sugar, sugar substitute, starch                      | >0.0001 | >0.0001 | <b>0.49</b> |

Abbreviations: FC: Fold Change; T: tumor; NT: nontumor

Red: Abundant in tumor; Blue: Abundant in nontumor

Metabolites in bold are unique to liver cancer



Supplemental Table 3: Differentially abundant metabolites in pancreas cancer

| Metabolite                                               | Super Pathway          | Sub Pathway                                                  | Parametric p-value | Permutation p-value | FC TvsNT |
|----------------------------------------------------------|------------------------|--------------------------------------------------------------|--------------------|---------------------|----------|
| taurine                                                  | Amino acid             | Cysteine, methionine, SAM, taurine metabolism                | <0.0001            | < 1e-07             | 2.63     |
| N-acetyl-aspartyl-glutamate (NAAG)                       | Amino acid             | Glutamate metabolism                                         | 0.001              | 0.001               | 0.48     |
| <b>cysteine-glutathione disulfide</b>                    | Amino acid             | Glutathione metabolism                                       | <0.0001            | 0.001               | 4.76     |
| <b>glutathione, oxidized (GSSG)</b>                      | Amino acid             | Glutathione metabolism                                       | 0.001              | 0.002               | 3.85     |
| glutathione, reduced (GSH)                               | Amino acid             | Glutathione metabolism                                       | 0.004              | 0.004               | 3.70     |
| <b>guanidinoacetate</b>                                  | Amino acid             | Guanidino and acetamido metabolism                           | 0.003              | 0.004               | 0.26     |
| C-glycosyltryptophan*                                    | Amino acid             | Tryptophan metabolism                                        | < 1e-07            | < 1e-07             | 2.00     |
| kynurenine                                               | Amino acid             | Tryptophan metabolism                                        | <0.0001            | 0.000               | 2.17     |
| <b>ornithine</b>                                         | Amino acid             | Urea cycle; arginine-, proline-, metabolism                  | <0.0001            | 0.001               | 0.49     |
| isovalerylcarnitine                                      | Amino acid             | Valine, leucine and isoleucine metabolism                    | <0.0001            | < 1e-07             | 2.04     |
| maltotriose                                              | Carbohydrate           | Fructose, mannose, galactose, starch, and sucrose metabolism | 0.008              | 0.009               | 4.00     |
| <b>nicotinamide adenine dinucleotide (NAD+)</b>          | Cofactors and vitamins | Nicotinate and nicotinamide metabolism                       | 0.001              | 0.001               | 0.22     |
| <b>nicotinamide ribonucleotide (NMN)</b>                 | Cofactors and vitamins | Nicotinate and nicotinamide metabolism                       | <0.0001            | < 1e-07             | 0.15     |
| citrate                                                  | Energy                 | Krebs cycle                                                  | 0.004              | 0.003               | 3.13     |
| <b>succinate</b>                                         | Energy                 | Krebs cycle                                                  | <0.0001            | <0.0001             | 0.42     |
| succinylcarnitine                                        | Energy                 | Krebs cycle                                                  | <0.0001            | 0.000               | 0.35     |
| <b>taurochenodeoxycholate</b>                            | Lipid                  | Bile acid metabolism                                         | 0.007              | 0.007               | 0.49     |
| <b>decanoylcarnitine</b>                                 | Lipid                  | Carnitine metabolism                                         | <0.0001            | <0.0001             | 2.08     |
| hexanoylcarnitine                                        | Lipid                  | Carnitine metabolism                                         | < 1e-07            | < 1e-07             | 2.63     |
| <b>octanoylcarnitine</b>                                 | Lipid                  | Carnitine metabolism                                         | <0.0001            | < 1e-07             | 2.44     |
| <b>1,2-dipalmitoylglycerol</b>                           | Lipid                  | Diacylglycerol                                               | 0.007              | 0.006               | 0.45     |
| <b>prostaglandin E2</b>                                  | Lipid                  | Eicosanoid                                                   | <0.0001            | < 1e-07             | 2.63     |
| linoleate (18:2n6)                                       | Lipid                  | Essential fatty acid                                         | <0.0001            | < 1e-07             | 0.51     |
| linolenate [alpha or gamma; (18:3n3 or 6)]               | Lipid                  | Essential fatty acid                                         | <0.0001            | < 1e-07             | 0.36     |
| butyrylcarnitine                                         | Lipid                  | Fatty acid metabolism (also BCAA metabolism)                 | < 1e-07            | < 1e-07             | 3.13     |
| <b>17-methylstearate</b>                                 | Lipid                  | Fatty acid, branched                                         | <0.0001            | < 1e-07             | 0.43     |
| <b>9,10-hydroxyoctadec-12(Z)-enoic acid</b>              | Lipid                  | Fatty acid, dihydroxy                                        | <0.0001            | < 1e-07             | 0.40     |
| <b>palmitate, methyl ester</b>                           | Lipid                  | Fatty acid, methyl ester                                     | 0.009              | 0.002               | 0.51     |
| <b>13-HODE + 9-HODE</b>                                  | Lipid                  | Fatty acid, monohydroxy                                      | <0.0001            | <0.0001             | 0.49     |
| glycerol                                                 | Lipid                  | Glycerolipid metabolism                                      | <0.0001            | < 1e-07             | 0.39     |
| glycerol 3-phosphate (G3P)                               | Lipid                  | Glycerolipid metabolism                                      | 0.001              | 0.001               | 0.35     |
| glycerophosphorylcholine (GPC)                           | Lipid                  | Glycerolipid metabolism                                      | <0.0001            | <0.0001             | 0.35     |
| 10-nonadecenoate (19:1n9)                                | Lipid                  | Long chain fatty acid                                        | <0.0001            | <0.0001             | 0.46     |
| dihomo-linoleate (20:2n6)                                | Lipid                  | Long chain fatty acid                                        | 0.002              | 0.002               | 0.50     |
| eicosenoate (20:1n9 or 11)                               | Lipid                  | Long chain fatty acid                                        | <0.0001            | 0.001               | 0.42     |
| margarate (17:0)                                         | Lipid                  | Long chain fatty acid                                        | <0.0001            | < 1e-07             | 0.48     |
| <b>myristate (14:0)</b>                                  | Lipid                  | Long chain fatty acid                                        | <0.0001            | 0.000               | 0.52     |
| myristoleate (14:1n5)                                    | Lipid                  | Long chain fatty acid                                        | <0.0001            | < 1e-07             | 0.40     |
| <b>nonadecanoate (19:0)</b>                              | Lipid                  | Long chain fatty acid                                        | 0.001              | 0.001               | 0.53     |
| palmitoleate (16:1n7)                                    | Lipid                  | Long chain fatty acid                                        | <0.0001            | < 1e-07             | 0.53     |
| <b>1-oleoylglycerophosphoinositol*</b>                   | Lipid                  | Lysolipid                                                    | <0.0001            | <0.0001             | 0.22     |
| <b>1-palmitoylglycerophosphoinositol*</b>                | Lipid                  | Lysolipid                                                    | 0.001              | 0.001               | 0.22     |
| <b>5-dodecenoate (12:1n7)</b>                            | Lipid                  | Medium chain fatty acid                                      | 0.010              | 0.012               | 0.51     |
| <b>laurate (12:0)</b>                                    | Lipid                  | Medium chain fatty acid                                      | <0.0001            | < 1e-07             | 0.47     |
| <b>1-docosahexaenoylglycerol (1-monodocosahexaenoin)</b> | Lipid                  | Monoacylglycerol                                             | 0.001              | 0.000               | 0.31     |
| <b>1-myristoylglycerol (1-monomyristin)</b>              | Lipid                  | Monoacylglycerol                                             | <0.0001            | < 1e-07             | 0.09     |
| 1-oleoylglycerol (1-monoolein)                           | Lipid                  | Monoacylglycerol                                             | 0.009              | 0.008               | 0.33     |
| 1-palmitoylglycerol (1-monopalmitin)                     | Lipid                  | Monoacylglycerol                                             | 0.004              | 0.003               | 0.32     |
| <b>1-pentadecanoylglycerol (1-monopentadecanoin)</b>     | Lipid                  | Monoacylglycerol                                             | <0.0001            | < 1e-07             | 0.34     |

|                                             |             |                                            |         |         |      |
|---------------------------------------------|-------------|--------------------------------------------|---------|---------|------|
| <b>1-stearoylglycerol (1-monostearin)</b>   | Lipid       | Monoacylglycerol                           | <0.0001 | <0.0001 | 0.24 |
| <b>2-linoleoylglycerol (2-monolinolein)</b> | Lipid       | Monoacylglycerol                           | <0.0001 | <0.0001 | 0.22 |
| 2-myristoylglycerol (2-monomyristin)        | Lipid       | Monoacylglycerol                           | <0.0001 | < 1e-07 | 0.18 |
| <b>2-oleoylglycerol (2-monoolein)</b>       | Lipid       | Monoacylglycerol                           | 0.004   | 0.003   | 0.51 |
| <b>2-palmitoylglycerol (2-monopalmitin)</b> | Lipid       | Monoacylglycerol                           | <0.0001 | < 1e-07 | 0.13 |
| <b>stearoyl sphingomyelin</b>               | Lipid       | Sphingolipid                               | 0.001   | 0.001   | 0.50 |
| <b>cytidine</b>                             | Nucleotide  | Pyrimidine metabolism, cytidine containing | <0.0001 | <0.0001 | 0.38 |
| <b>isoleucylisoleucine</b>                  | Peptide     | Dipeptide                                  | 0.004   | 0.004   | 3.23 |
| <b>pro-hydroxy-pro</b>                      | Peptide     | Dipeptide                                  | <0.0001 | < 1e-07 | 2.22 |
| <b>threonylphenylalanine</b>                | Peptide     | Dipeptide                                  | 0.003   | 0.003   | 2.56 |
| <b>N-ethylglycinexylidide*</b>              | Xenobiotics | Drug                                       | <0.0001 | < 1e-07 | 0.53 |

Abbreviations: FC: Fold Change; T: tumor; NT: nontumor

Red: Abundant in tumor; Blue: Abundant in nontumor

Metabolites in bold are unique to pancreatic cancer

Supplemental Table 4: Differentially abundant metabolites in breast cancer

| Metabolite                             | Super Pathway | Sub Pathway                                                  | Parametric p-value | Permutation p-value | FC TvsNT |
|----------------------------------------|---------------|--------------------------------------------------------------|--------------------|---------------------|----------|
| <b>aspartate</b>                       | Amino acid    | Alanine and aspartate metabolism                             | 0.001              | 0.001               | 1.47     |
| beta-alanine                           | Amino acid    | Alanine and aspartate metabolism                             | < 1e-07            | < 1e-07             | 2.63     |
| <b>N-acetylalanine</b>                 | Amino acid    | Alanine and aspartate metabolism                             | < 1e-07            | < 1e-07             | 2.17     |
| <b>N-acetylaspartate (NAA)</b>         | Amino acid    | Alanine and aspartate metabolism                             | < 1e-07            | < 1e-07             | 10.20    |
| N-acetyl-aspartyl-glutamate (NAAG)     | Amino acid    | Alanine and aspartate metabolism                             | < 1e-07            | < 1e-07             | 2.63     |
| <b>cystathionine</b>                   | Amino acid    | Cysteine, methionine, SAM, taurine metabolism                | < 1e-07            | < 1e-07             | 5.26     |
| cysteine                               | Amino acid    | Cysteine, methionine, SAM, taurine metabolism                | < 1e-07            | < 1e-07             | 4.00     |
| cystine                                | Amino acid    | Cysteine, methionine, SAM, taurine metabolism                | < 1e-07            | < 1e-07             | 4.00     |
| <b>N-acetylmethionine</b>              | Amino acid    | Cysteine, methionine, SAM, taurine metabolism                | < 1e-07            | < 1e-07             | 3.57     |
| <b>S-adenosylhomocysteine (SAH)</b>    | Amino acid    | Cysteine, methionine, SAM, taurine metabolism                | <0.0001            | < 1e-07             | 2.63     |
| S-adenosylmethionine (SAM)             | Amino acid    | Cysteine, methionine, SAM, taurine metabolism                | <0.0001            | < 1e-07             | 1.96     |
| taurine                                | Amino acid    | Cysteine, methionine, SAM, taurine metabolism                | < 1e-07            | < 1e-07             | 3.57     |
| <b>glutamate</b>                       | Amino acid    | Glutamate metabolism                                         | < 1e-07            | < 1e-07             | 5.88     |
| <b>5-oxoproline</b>                    | Amino acid    | Glutathione metabolism                                       | < 1e-07            | < 1e-07             | 2.08     |
| glutathione, reduced (GSH)             | Amino acid    | Glutathione metabolism                                       | <0.0001            | <0.0001             | 2.56     |
| <b>betaine</b>                         | Amino acid    | Glycine, serine and threonine metabolism                     | < 1e-07            | < 1e-07             | 2.50     |
| <b>glycine</b>                         | Amino acid    | Glycine, serine and threonine metabolism                     | < 1e-07            | < 1e-07             | 2.94     |
| <b>N-acetylserine</b>                  | Amino acid    | Glycine, serine and threonine metabolism                     | < 1e-07            | < 1e-07             | 2.33     |
| <b>N-acetylthreonine</b>               | Amino acid    | Glycine, serine and threonine metabolism                     | < 1e-07            | < 1e-07             | 2.22     |
| serine                                 | Amino acid    | Glycine, serine and threonine metabolism                     | < 1e-07            | < 1e-07             | 2.38     |
| <b>threonine</b>                       | Amino acid    | Glycine, serine and threonine metabolism                     | <0.0001            | < 1e-07             | 1.96     |
| <b>N6-acetyllysine</b>                 | Amino acid    | Lysine metabolism                                            | < 1e-07            | < 1e-07             | 3.13     |
| <b>3-(4-hydroxyphenyl)lactate</b>      | Amino acid    | Phenylalanine & tyrosine metabolism                          | < 1e-07            | < 1e-07             | 2.94     |
| <b>putrescine</b>                      | Amino acid    | Polyamine metabolism                                         | < 1e-07            | < 1e-07             | 4.55     |
| C-glycosyltryptophan*                  | Amino acid    | Tryptophan metabolism                                        | < 1e-07            | < 1e-07             | 5.00     |
| kynurenine                             | Amino acid    | Tryptophan metabolism                                        | < 1e-07            | < 1e-07             | 3.57     |
| <b>tryptophan</b>                      | Amino acid    | Tryptophan metabolism                                        | < 1e-07            | < 1e-07             | 2.22     |
| <b>tryptophan betaine</b>              | Amino acid    | Tryptophan metabolism                                        | < 1e-07            | < 1e-07             | 2.63     |
| <b>dimethylarginine (SDMA + ADMA)</b>  | Amino acid    | Urea cycle; arginine-, proline-, metabolism                  | < 1e-07            | < 1e-07             | 4.17     |
| <b>proline</b>                         | Amino acid    | Urea cycle; arginine-, proline-, metabolism                  | < 1e-07            | < 1e-07             | 3.13     |
| <b>stachydrine</b>                     | Amino acid    | Urea cycle; arginine-, proline-, metabolism                  | < 1e-07            | < 1e-07             | 2.27     |
| <b>trans-4-hydroxyproline</b>          | Amino acid    | Urea cycle; arginine-, proline-, metabolism                  | < 1e-07            | < 1e-07             | 4.35     |
| <b>urea</b>                            | Amino acid    | Urea cycle; arginine-, proline-, metabolism                  | < 1e-07            | < 1e-07             | 2.70     |
| <b>2-methylbutyrocarnitine</b>         | Amino acid    | Valine, leucine and isoleucine metabolism                    | <0.0001            | <0.0001             | 2.13     |
| <b>hydroxyisovaleroyl carnitine</b>    | Amino acid    | Valine, leucine and isoleucine metabolism                    | < 1e-07            | < 1e-07             | 2.33     |
| <b>leucine</b>                         | Amino acid    | Valine, leucine and isoleucine metabolism                    | < 1e-07            | < 1e-07             | 2.04     |
| <b>erythronate*</b>                    | Carbohydrate  | Aminosugars metabolism                                       | < 1e-07            | < 1e-07             | 4.35     |
| <b>fucose</b>                          | Carbohydrate  | Aminosugars metabolism                                       | < 1e-07            | < 1e-07             | 2.70     |
| <b>N-acetylglucosamine</b>             | Carbohydrate  | Aminosugars metabolism                                       | <0.0001            | < 1e-07             | 2.38     |
| <b>N-acetylglucosamine 6-phosphate</b> | Carbohydrate  | Aminosugars metabolism                                       | < 1e-07            | < 1e-07             | 2.56     |
| <b>N-acetylneuraminate</b>             | Carbohydrate  | Aminosugars metabolism                                       | < 1e-07            | < 1e-07             | 3.03     |
| <b>fructose</b>                        | Carbohydrate  | Fructose, mannose, galactose, starch, and sucrose metabolism | <0.0001            | < 1e-07             | 2.56     |
| <b>maltose</b>                         | Carbohydrate  | Fructose, mannose, galactose, starch, and sucrose metabolism | <0.0001            | < 1e-07             | 3.03     |
| <b>maltotetraose</b>                   | Carbohydrate  | Fructose, mannose, galactose, starch, and sucrose metabolism | <0.0001            | < 1e-07             | 2.27     |
| <b>maltotriose</b>                     | Carbohydrate  | Fructose, mannose, galactose, starch, and sucrose metabolism | <0.0001            | < 1e-07             | 2.63     |
| mannose                                | Carbohydrate  | Fructose, mannose, galactose, starch, and sucrose metabolism | <0.0001            | < 1e-07             | 2.13     |
| <b>mannose-6-phosphate</b>             | Carbohydrate  | Fructose, mannose, galactose, starch, and sucrose metabolism | < 1e-07            | < 1e-07             | 5.88     |
| sorbitol                               | Carbohydrate  | Fructose, mannose, galactose, starch, and sucrose metabolism | <0.0001            | < 1e-07             | 2.17     |
| <b>3-phosphoglycerate</b>              | Carbohydrate  | Glycolysis, gluconeogenesis, pyruvate metabolism             | <0.0001            | < 1e-07             | 2.13     |

|                                                           |                        |                                                  |         |         |             |
|-----------------------------------------------------------|------------------------|--------------------------------------------------|---------|---------|-------------|
| <b>fructose-6-phosphate</b>                               | Carbohydrate           | Glycolysis, gluconeogenesis, pyruvate metabolism | < 1e-07 | < 1e-07 | <b>7.14</b> |
| glucose                                                   | Carbohydrate           | Glycolysis, gluconeogenesis, pyruvate metabolism | 0.001   | 0.002   | <b>2.00</b> |
| <b>glucose-6-phosphate (G6P)</b>                          | Carbohydrate           | Glycolysis, gluconeogenesis, pyruvate metabolism | < 1e-07 | < 1e-07 | <b>8.33</b> |
| <b>lactate</b>                                            | Carbohydrate           | Glycolysis, gluconeogenesis, pyruvate metabolism | < 1e-07 | < 1e-07 | <b>4.00</b> |
| <b>phosphoenolpyruvate (PEP)</b>                          | Carbohydrate           | Glycolysis, gluconeogenesis, pyruvate metabolism | <0.0001 | <0.0001 | <b>1.96</b> |
| <b>gluconate</b>                                          | Carbohydrate           | Nucleotide sugars, pentose metabolism            | 0.000   | < 1e-07 | <b>3.03</b> |
| <b>Isobar: ribulose 5-phosphate, xylulose 5-phosphate</b> | Carbohydrate           | Nucleotide sugars, pentose metabolism            | < 1e-07 | < 1e-07 | <b>3.13</b> |
| <b>ribose</b>                                             | Carbohydrate           | Nucleotide sugars, pentose metabolism            | < 1e-07 | < 1e-07 | <b>3.33</b> |
| <b>ribulose</b>                                           | Carbohydrate           | Nucleotide sugars, pentose metabolism            | <0.0001 | < 1e-07 | <b>1.96</b> |
| <b>ascorbate (Vitamin C)</b>                              | Cofactors and vitamins | Ascorbate and aldarate metabolism                | <0.0001 | < 1e-07 | <b>5.88</b> |
| <b>threonate</b>                                          | Cofactors and vitamins | Ascorbate and aldarate metabolism                | <0.0001 | < 1e-07 | <b>2.22</b> |
| <b>1-methylnicotinamide</b>                               | Cofactors and vitamins | Nicotinate and nicotinamide metabolism           | < 1e-07 | < 1e-07 | <b>2.94</b> |
| nicotinamide                                              | Cofactors and vitamins | Nicotinate and nicotinamide metabolism           | < 1e-07 | < 1e-07 | <b>2.70</b> |
| <b>pantothenate</b>                                       | Cofactors and vitamins | Pantothenate and CoA metabolism                  | < 1e-07 | < 1e-07 | <b>2.94</b> |
| <b>riboflavin (Vitamin B2)</b>                            | Cofactors and vitamins | Riboflavin metabolism                            | 0.000   | < 1e-07 | <b>2.17</b> |
| citrate                                                   | Energy                 | Krebs cycle                                      | 0.001   | 0.001   | <b>2.17</b> |
| fumarate                                                  | Energy                 | Krebs cycle                                      | <0.0001 | < 1e-07 | <b>2.22</b> |
| malate                                                    | Energy                 | Krebs cycle                                      | < 1e-07 | < 1e-07 | <b>4.55</b> |
| succinylcarnitine                                         | Energy                 | Krebs cycle                                      | 0.000   | < 1e-07 | <b>2.94</b> |
| <b>phosphate</b>                                          | Energy                 | Oxidative phosphorylation                        | < 1e-07 | < 1e-07 | <b>3.13</b> |
| <b>pyrophosphate (PPi)</b>                                | Energy                 | Oxidative phosphorylation                        | <0.0001 | < 1e-07 | <b>2.70</b> |
| <b>3-dehydrocarnitine*</b>                                | Lipid                  | Carnitine metabolism                             | <0.0001 | < 1e-07 | <b>2.56</b> |
| <b>acetylcarnitine</b>                                    | Lipid                  | Carnitine metabolism                             | < 1e-07 | < 1e-07 | <b>2.04</b> |
| <b>carnitine</b>                                          | Lipid                  | Carnitine metabolism                             | <0.0001 | < 1e-07 | <b>2.44</b> |
| deoxycarnitine                                            | Lipid                  | Carnitine metabolism                             | < 1e-07 | < 1e-07 | <b>3.57</b> |
| hexanoylcarnitine                                         | Lipid                  | Carnitine metabolism                             | <0.0001 | < 1e-07 | <b>2.70</b> |
| <b>oleoylcarnitine</b>                                    | Lipid                  | Carnitine metabolism                             | <0.0001 | < 1e-07 | <b>3.03</b> |
| palmitoylcarnitine                                        | Lipid                  | Carnitine metabolism                             | <0.0001 | < 1e-07 | <b>3.23</b> |
| stearoylcarnitine                                         | Lipid                  | Carnitine metabolism                             | < 1e-07 | < 1e-07 | <b>5.56</b> |
| <b>dihomo-linolenate (20:3n3 or n6)</b>                   | Lipid                  | Essential fatty acid                             | < 1e-07 | < 1e-07 | <b>4.35</b> |
| <b>docosahexaenoate (DHA; 22:6n3)</b>                     | Lipid                  | Essential fatty acid                             | < 1e-07 | < 1e-07 | <b>3.13</b> |
| docosapentaenoate (n3 DPA; 22:5n3)                        | Lipid                  | Essential fatty acid                             | < 1e-07 | < 1e-07 | <b>4.17</b> |
| docosapentaenoate (n6 DPA, 22:5n6)                        | Lipid                  | Essential fatty acid                             | <0.0001 | < 1e-07 | <b>2.27</b> |
| <b>eicosapentaenoate (EPA; 20:5n3)</b>                    | Lipid                  | Essential fatty acid                             | < 1e-07 | < 1e-07 | <b>2.63</b> |
| linolenate [alpha or gamma; (18:3n3 or 6)]                | Lipid                  | Essential fatty acid                             | <0.0001 | < 1e-07 | <b>2.17</b> |
| butyrylcarnitine                                          | Lipid                  | Fatty acid metabolism (also BCAA metabolism)     | < 1e-07 | < 1e-07 | <b>4.17</b> |
| <b>2-hydroxypalmitate</b>                                 | Lipid                  | Fatty acid, monohydroxy                          | < 1e-07 | < 1e-07 | <b>2.78</b> |
| <b>4-hydroxyphenylpyruvate</b>                            | Lipid                  | Fatty acid, monohydroxy                          | <0.0001 | < 1e-07 | <b>1.96</b> |
| <b>choline phosphate</b>                                  | Lipid                  | Glycerolipid metabolism                          | < 1e-07 | < 1e-07 | <b>2.70</b> |
| <b>cytidine 5'-diphosphocholine</b>                       | Lipid                  | Glycerolipid metabolism                          | < 1e-07 | < 1e-07 | <b>8.33</b> |
| <b>ethanolamine</b>                                       | Lipid                  | Glycerolipid metabolism                          | < 1e-07 | < 1e-07 | <b>4.17</b> |
| glycerol                                                  | Lipid                  | Glycerolipid metabolism                          | <0.0001 | < 1e-07 | <b>2.27</b> |
| glycerol 3-phosphate (G3P)                                | Lipid                  | Glycerolipid metabolism                          | <0.0001 | < 1e-07 | <b>2.27</b> |
| phosphoethanolamine                                       | Lipid                  | Glycerolipid metabolism                          | < 1e-07 | < 1e-07 | <b>9.09</b> |
| <b>inositol 1-phosphate (I1P)</b>                         | Lipid                  | Inositol metabolism                              | < 1e-07 | < 1e-07 | <b>4.76</b> |
| <b>myo-inositol</b>                                       | Lipid                  | Inositol metabolism                              | <0.0001 | < 1e-07 | <b>1.96</b> |
| <b>scyllo-inositol</b>                                    | Lipid                  | Inositol metabolism                              | <0.0001 | < 1e-07 | <b>2.17</b> |
| 10-nonadecenoate (19:1n9)                                 | Lipid                  | Long chain fatty acid                            | < 1e-07 | < 1e-07 | <b>2.70</b> |
| <b>adrenate (22:4n6)</b>                                  | Lipid                  | Long chain fatty acid                            | < 1e-07 | < 1e-07 | <b>4.35</b> |
| <b>arachidonate (20:4n6)</b>                              | Lipid                  | Long chain fatty acid                            | < 1e-07 | < 1e-07 | <b>4.35</b> |
| <b>cis-vaccenate (18:1n7)</b>                             | Lipid                  | Long chain fatty acid                            | <0.0001 | < 1e-07 | <b>2.38</b> |
| dihomo-linoleate (20:2n6)                                 | Lipid                  | Long chain fatty acid                            | < 1e-07 | < 1e-07 | <b>3.57</b> |
| docosadienoate (22:2n6)                                   | Lipid                  | Long chain fatty acid                            | < 1e-07 | < 1e-07 | <b>4.55</b> |

|                                                      |             |                                                      |         |         |             |
|------------------------------------------------------|-------------|------------------------------------------------------|---------|---------|-------------|
| <b>docosatrienoate (22:3n3)</b>                      | Lipid       | Long chain fatty acid                                | <0.0001 | < 1e-07 | <b>4.35</b> |
| eicosenoate (20:1n9 or 11)                           | Lipid       | Long chain fatty acid                                | < 1e-07 | < 1e-07 | <b>3.45</b> |
| linoleate (18:2n6)                                   | Lipid       | Long chain fatty acid                                | < 1e-07 | < 1e-07 | <b>1.96</b> |
| margarate (17:0)                                     | Lipid       | Long chain fatty acid                                | < 1e-07 | < 1e-07 | <b>2.00</b> |
| myristoleate (14:1n5)                                | Lipid       | Long chain fatty acid                                | < 1e-07 | < 1e-07 | <b>1.96</b> |
| <b>oleate (18:1n9)</b>                               | Lipid       | Long chain fatty acid                                | < 1e-07 | < 1e-07 | <b>2.70</b> |
| <b>palmitate (16:0)</b>                              | Lipid       | Long chain fatty acid                                | < 1e-07 | < 1e-07 | <b>1.96</b> |
| palmitoleate (16:1n7)                                | Lipid       | Long chain fatty acid                                | < 1e-07 | < 1e-07 | <b>2.08</b> |
| <b>stearidonate (18:4n3)</b>                         | Lipid       | Long chain fatty acid                                | <0.0001 | < 1e-07 | <b>2.04</b> |
| <b>1-oleoylglycerophosphocholine</b>                 | Lipid       | Lysolipid                                            | <0.0001 | < 1e-07 | <b>4.35</b> |
| <b>1-oleoylglycerophosphoethanolamine</b>            | Lipid       | Lysolipid                                            | <0.0001 | <0.0001 | <b>2.13</b> |
| <b>1-palmitoylglycerophosphocholine</b>              | Lipid       | Lysolipid                                            | < 1e-07 | < 1e-07 | <b>7.14</b> |
| <b>1-stearoylglycerophosphocholine</b>               | Lipid       | Lysolipid                                            | < 1e-07 | < 1e-07 | <b>7.14</b> |
| <b>1-stearoylglycerophosphoethanolamine</b>          | Lipid       | Lysolipid                                            | < 1e-07 | < 1e-07 | <b>4.00</b> |
| <b>1-stearoylglycerophosphoinositol</b>              | Lipid       | Lysolipid                                            | <0.0001 | < 1e-07 | <b>2.78</b> |
| <b>2-arachidonoylglycerophosphocholine*</b>          | Lipid       | Lysolipid                                            | <0.0001 | < 1e-07 | <b>5.00</b> |
| <b>2-arachidonoylglycerophosphoethanolamine*</b>     | Lipid       | Lysolipid                                            | < 1e-07 | < 1e-07 | <b>2.86</b> |
| <b>2-docosahexaenoylglycerophosphoethanolamine*</b>  | Lipid       | Lysolipid                                            | <0.0001 | < 1e-07 | <b>3.45</b> |
| <b>2-docosapentaenoylglycerophosphoethanolamine*</b> | Lipid       | Lysolipid                                            | < 1e-07 | < 1e-07 | <b>4.35</b> |
| <b>2-linoleoylglycerophosphocholine*</b>             | Lipid       | Lysolipid                                            | <0.0001 | < 1e-07 | <b>2.78</b> |
| <b>2-linoleoylglycerophosphoethanolamine*</b>        | Lipid       | Lysolipid                                            | <0.0001 | < 1e-07 | <b>2.22</b> |
| <b>2-oleoylglycerophosphocholine*</b>                | Lipid       | Lysolipid                                            | <0.0001 | < 1e-07 | <b>3.85</b> |
| <b>2-oleoylglycerophosphoethanolamine*</b>           | Lipid       | Lysolipid                                            | <0.0001 | < 1e-07 | <b>4.00</b> |
| <b>2-palmitoleoylglycerophosphocholine*</b>          | Lipid       | Lysolipid                                            | <0.0001 | < 1e-07 | <b>3.13</b> |
| <b>2-palmitoylglycerophosphocholine*</b>             | Lipid       | Lysolipid                                            | <0.0001 | < 1e-07 | <b>4.17</b> |
| <b>1-palmitoylplasmenyethanolamine</b>               | Lipid       | Lysolipid                                            | <0.0001 | < 1e-07 | <b>4.55</b> |
| 1-oleoylglycerol (1-monoollein)                      | Lipid       | Monoacylglycerol                                     | <0.0001 | < 1e-07 | <b>5.00</b> |
| 1-palmitoylglycerol (1-monopalmitin)                 | Lipid       | Monoacylglycerol                                     | <0.0001 | < 1e-07 | <b>3.45</b> |
| 1-stearoylglycerol (1-monostearin)                   | Lipid       | Monoacylglycerol                                     | < 1e-07 | < 1e-07 | <b>4.55</b> |
| <b>sphinganine</b>                                   | Lipid       | Sphingolipid                                         | <0.0001 | < 1e-07 | <b>6.25</b> |
| <b>sphingosine</b>                                   | Lipid       | Sphingolipid                                         | < 1e-07 | < 1e-07 | <b>2.56</b> |
| <b>palmitoyl sphinomyelin</b>                        | Lipid       | Sphingolipid                                         | < 1e-07 | < 1e-07 | <b>2.44</b> |
| <b>hypoxanthine</b>                                  | Nucleotide  | Purine metabolism, (hypo)xanthine/inosine containing | < 1e-07 | < 1e-07 | <b>2.33</b> |
| xanthosine                                           | Nucleotide  | Purine metabolism, (hypo)xanthine/inosine containing | < 1e-07 | < 1e-07 | <b>2.44</b> |
| <b>adenosine</b>                                     | Nucleotide  | Purine metabolism, adenine containing                | <0.0001 | < 1e-07 | <b>2.78</b> |
| adenosine 3'-monophosphate (3'-AMP)                  | Nucleotide  | Purine metabolism, adenine containing                | < 1e-07 | < 1e-07 | <b>2.27</b> |
| <b>N1-methyladenosine</b>                            | Nucleotide  | Purine metabolism, adenine containing                | < 1e-07 | < 1e-07 | <b>2.27</b> |
| <b>guanine</b>                                       | Nucleotide  | Purine metabolism, guanine containing                | < 1e-07 | < 1e-07 | <b>3.03</b> |
| <b>guanosine</b>                                     | Nucleotide  | Purine metabolism, guanine containing                | < 1e-07 | < 1e-07 | <b>3.13</b> |
| urate                                                | Nucleotide  | Purine metabolism, urate metabolism                  | <0.0001 | < 1e-07 | <b>6.25</b> |
| <b>cytidine 5'-monophosphate (5'-CMP)</b>            | Nucleotide  | Pyrimidine metabolism, cytidine containing           | <0.0001 | < 1e-07 | <b>2.38</b> |
| 5,6-dihydrouracil                                    | Nucleotide  | Pyrimidine metabolism, uracil containing             | < 1e-07 | < 1e-07 | <b>2.13</b> |
| <b>pseudouridine</b>                                 | Nucleotide  | Pyrimidine metabolism, uracil containing             | < 1e-07 | < 1e-07 | <b>2.17</b> |
| uracil                                               | Nucleotide  | Pyrimidine metabolism, uracil containing             | < 1e-07 | < 1e-07 | <b>4.55</b> |
| <b>uridine</b>                                       | Nucleotide  | Pyrimidine metabolism, uracil containing             | < 1e-07 | < 1e-07 | <b>2.27</b> |
| <b>aspartylleucine</b>                               | Peptide     | Dipeptide                                            | <0.0001 | < 1e-07 | <b>9.09</b> |
| <b>glycylproline</b>                                 | Peptide     | Dipeptide                                            | < 1e-07 | < 1e-07 | <b>2.04</b> |
| gamma-glutamylglutamate                              | Peptide     | gamma-glutamyl                                       | <0.0001 | < 1e-07 | <b>2.50</b> |
| <b>gamma-glutamylleucine</b>                         | Peptide     | gamma-glutamyl                                       | < 1e-07 | < 1e-07 | <b>2.56</b> |
| glycerol 2-phosphate                                 | Xenobiotics | Chemical                                             | <0.0001 | < 1e-07 | <b>2.04</b> |
| <b>ergothioneine</b>                                 | Xenobiotics | Plant                                                | < 1e-07 | < 1e-07 | <b>2.27</b> |

Abbreviations: FC: Fold Change; T: tumor; NT: nontumor

Red: Abundant in tumor; Blue: Abundant in nontumor  
Metabolites in bold are unique to breast cancer

Supplemental Table 5: Comparison of Tumor and Cancer Specific Metabolites

| Metabolite                            | Super Pathway | Sub Pathway                                   | Liver    | Pancreas | Breast   |
|---------------------------------------|---------------|-----------------------------------------------|----------|----------|----------|
|                                       |               |                                               | FC TvsNT | FC TvsNT | FC TvsNT |
| <b>aspartate</b>                      | Amino acid    | Alanine and aspartate metabolism              |          |          | 1.47     |
| beta-alanine                          | Amino acid    | Alanine and aspartate metabolism              | 0.48     |          | 2.63     |
| <b>N-acetylalanine</b>                | Amino acid    | Alanine and aspartate metabolism              |          |          | 2.17     |
| <b>N-acetylaspartate (NAA)</b>        | Amino acid    | Alanine and aspartate metabolism              |          |          | 10.20    |
| N-acetyl-aspartyl-glutamate (NAAG)    | Amino acid    | Alanine and aspartate metabolism              |          | 0.48     | 2.63     |
| <b>2-aminobutyrate</b>                | Amino acid    | Butanoate metabolism                          | 0.50     |          |          |
| <b>cystathionine</b>                  | Amino acid    | Cysteine, methionine, SAM, taurine metabolism |          |          | 5.26     |
| cysteine                              | Amino acid    | Cysteine, methionine, SAM, taurine metabolism | 0.31     |          | 4.00     |
| cystine                               | Amino acid    | Cysteine, methionine, SAM, taurine metabolism | 0.33     |          | 4.00     |
| <b>N-acetylmethionine</b>             | Amino acid    | Cysteine, methionine, SAM, taurine metabolism |          |          | 3.57     |
| S-adenosylhomocysteine (SAH)          | Amino acid    | Cysteine, methionine, SAM, taurine metabolism | 0.44     |          | 2.63     |
| <b>S-adenosylmethionine (SAM)</b>     | Amino acid    | Cysteine, methionine, SAM, taurine metabolism |          |          | 1.96     |
| taurine                               | Amino acid    | Cysteine, methionine, SAM, taurine metabolism |          | 2.63     | 3.57     |
| <b>gamma-aminobutyrate (GABA)</b>     | Amino acid    | Glutamate metabolism                          | 0.28     |          |          |
| glutamate                             | Amino acid    | Glutamate metabolism                          |          |          | 5.88     |
| <b>pyroglutamine*</b>                 | Amino acid    | Glutamate metabolism                          | 0.51     |          |          |
| <b>5-oxoproline</b>                   | Amino acid    | Glutathione metabolism                        |          |          | 2.08     |
| <b>cysteine-glutathione disulfide</b> | Amino acid    | Glutathione metabolism                        |          | 4.76     |          |
| <b>glutathione, oxidized (GSSG)</b>   | Amino acid    | Glutathione metabolism                        |          | 3.85     |          |
| glutathione, reduced (GSH)            | Amino acid    | Glutathione metabolism                        |          | 3.70     | 2.56     |
| <b>betaine</b>                        | Amino acid    | Glycine, serine and threonine metabolism      |          |          | 2.50     |
| <b>glycine</b>                        | Amino acid    | Glycine, serine and threonine metabolism      |          |          | 2.94     |
| <b>N-acetylserine</b>                 | Amino acid    | Glycine, serine and threonine metabolism      |          |          | 2.33     |
| <b>N-acetylthreonine</b>              | Amino acid    | Glycine, serine and threonine metabolism      |          |          | 2.22     |
| serine                                | Amino acid    | Glycine, serine and threonine metabolism      |          |          | 2.38     |
| <b>threonine</b>                      | Amino acid    | Glycine, serine and threonine metabolism      |          |          | 1.96     |
| <b>guanidinoacetate</b>               | Amino acid    | Guanidino and acetamido metabolism            |          | 0.26     |          |
| <b>urocanate</b>                      | Amino acid    | Histidine metabolism                          | 2.27     |          |          |
| <b>methylglutaryl carnitine</b>       | Amino acid    | Lysine metabolism                             | 0.38     |          |          |
| <b>N6-acetyllysine</b>                | Amino acid    | Lysine metabolism                             |          |          | 3.13     |
| <b>3-(4-hydroxyphenyl)lactate</b>     | Amino acid    | Phenylalanine & tyrosine metabolism           |          |          | 2.94     |
| <b>5-methylthioadenosine (MTA)</b>    | Amino acid    | Polyamine metabolism                          | 3.45     |          |          |
| <b>putrescine</b>                     | Amino acid    | Polyamine metabolism                          |          |          | 4.55     |
| C-glycosyltryptophan*                 | Amino acid    | Tryptophan metabolism                         |          | 2.00     | 5.00     |
| kynurenine                            | Amino acid    | Tryptophan metabolism                         |          | 2.17     | 3.57     |
| <b>tryptophan</b>                     | Amino acid    | Tryptophan metabolism                         |          |          | 2.22     |
| <b>tryptophan betaine</b>             | Amino acid    | Tryptophan metabolism                         |          |          | 2.63     |
| <b>dimethylarginine (SDMA + ADMA)</b> | Amino acid    | Urea cycle; arginine-, proline-, metabolism   |          |          | 4.17     |
| <b>ornithine</b>                      | Amino acid    | Urea cycle; arginine-, proline-, metabolism   |          | 0.49     |          |
| <b>proline</b>                        | Amino acid    | Urea cycle; arginine-, proline-, metabolism   |          |          | 3.13     |
| <b>stachydrine</b>                    | Amino acid    | Urea cycle; arginine-, proline-, metabolism   |          |          | 2.27     |
| <b>trans-4-hydroxyproline</b>         | Amino acid    | Urea cycle; arginine-, proline-, metabolism   |          |          | 4.35     |
| <b>urea</b>                           | Amino acid    | Urea cycle; arginine-, proline-, metabolism   |          |          | 2.70     |
| <b>2-methylbutyrylcarnitine</b>       | Amino acid    | Valine, leucine and isoleucine metabolism     |          |          | 2.13     |
| <b>hydroxyisovaleryl carnitine</b>    | Amino acid    | Valine, leucine and isoleucine metabolism     |          |          | 2.33     |
| <b>isobutyrylcarnitine</b>            | Amino acid    | Valine, leucine and isoleucine metabolism     | 0.28     |          |          |
| isovalerylcarnitine                   | Amino acid    | Valine, leucine and isoleucine metabolism     | 0.53     | 2.04     |          |
| <b>leucine</b>                        | Amino acid    | Valine, leucine and isoleucine metabolism     |          |          | 2.04     |
| <b>tiglyl carnitine</b>               | Amino acid    | Valine, leucine and isoleucine metabolism     | 0.48     |          |          |

|                                                    |                        |                                                              |      |      |      |
|----------------------------------------------------|------------------------|--------------------------------------------------------------|------|------|------|
| valerylcarnitine                                   | Amino acid             | Valine, leucine and isoleucine metabolism                    | 3.13 |      |      |
| erythronate*                                       | Carbohydrate           | Aminosugars metabolism                                       |      |      | 4.35 |
| fucose                                             | Carbohydrate           | Aminosugars metabolism                                       |      |      | 2.70 |
| N-acetylglucosamine                                | Carbohydrate           | Aminosugars metabolism                                       |      |      | 2.38 |
| N-acetylglucosamine 6-phosphate                    | Carbohydrate           | Aminosugars metabolism                                       |      |      | 2.56 |
| N-acetylmannosamine                                | Carbohydrate           | Aminosugars metabolism                                       | 0.44 |      |      |
| N-acetylneuraminic acid                            | Carbohydrate           | Aminosugars metabolism                                       |      |      | 3.03 |
| fructose                                           | Carbohydrate           | Fructose, mannose, galactose, starch, and sucrose metabolism |      |      | 2.56 |
| maltose                                            | Carbohydrate           | Fructose, mannose, galactose, starch, and sucrose metabolism |      |      | 3.03 |
| maltotetraose                                      | Carbohydrate           | Fructose, mannose, galactose, starch, and sucrose metabolism |      |      | 2.27 |
| maltotriose                                        | Carbohydrate           | Fructose, mannose, galactose, starch, and sucrose metabolism |      | 4.00 | 2.63 |
| mannose                                            | Carbohydrate           | Fructose, mannose, galactose, starch, and sucrose metabolism | 0.46 |      | 2.13 |
| mannose-6-phosphate                                | Carbohydrate           | Fructose, mannose, galactose, starch, and sucrose metabolism |      |      | 5.88 |
| sorbitol                                           | Carbohydrate           | Fructose, mannose, galactose, starch, and sucrose metabolism | 0.31 |      | 2.17 |
| tagatose                                           | Carbohydrate           | Fructose, mannose, galactose, starch, and sucrose metabolism | 0.27 |      |      |
| 3-phosphoglycerate                                 | Carbohydrate           | Glycolysis, gluconeogenesis, pyruvate metabolism             |      |      | 2.13 |
| fructose-6-phosphate                               | Carbohydrate           | Glycolysis, gluconeogenesis, pyruvate metabolism             |      |      | 7.14 |
| glucose                                            | Carbohydrate           | Glycolysis, gluconeogenesis, pyruvate metabolism             | 0.28 |      | 2.00 |
| glucose-6-phosphate (G6P)                          | Carbohydrate           | Glycolysis, gluconeogenesis, pyruvate metabolism             |      |      | 8.33 |
| glucuronate                                        | Carbohydrate           | Glycolysis, gluconeogenesis, pyruvate metabolism             | 0.37 |      |      |
| lactate                                            | Carbohydrate           | Glycolysis, gluconeogenesis, pyruvate metabolism             |      |      | 4.00 |
| phosphoenolpyruvate (PEP)                          | Carbohydrate           | Glycolysis, gluconeogenesis, pyruvate metabolism             |      |      | 1.96 |
| 6-phosphogluconate                                 | Carbohydrate           | Nucleotide sugars, pentose metabolism                        | 0.54 |      |      |
| gluconate                                          | Carbohydrate           | Nucleotide sugars, pentose metabolism                        |      |      | 3.03 |
| Isobar: ribulose 5-phosphate, xylulose 5-phosphate | Carbohydrate           | Nucleotide sugars, pentose metabolism                        |      |      | 3.13 |
| ribitol                                            | Carbohydrate           | Nucleotide sugars, pentose metabolism                        | 0.37 |      |      |
| ribose                                             | Carbohydrate           | Nucleotide sugars, pentose metabolism                        |      |      | 3.33 |
| ribose 5-phosphate                                 | Carbohydrate           | Nucleotide sugars, pentose metabolism                        | 0.39 |      |      |
| ribulose                                           | Carbohydrate           | Nucleotide sugars, pentose metabolism                        |      |      | 1.96 |
| xylitol                                            | Carbohydrate           | Nucleotide sugars, pentose metabolism                        | 0.32 |      |      |
| ascorbate (Vitamin C)                              | Cofactors and vitamins | Ascorbate and aldarate metabolism                            |      |      | 5.88 |
| glucarate (saccharate)                             | Cofactors and vitamins | Ascorbate and aldarate metabolism                            | 0.48 |      |      |
| gulono-1,4-lactone                                 | Cofactors and vitamins | Ascorbate and aldarate metabolism                            | 0.29 |      |      |
| threonate                                          | Cofactors and vitamins | Ascorbate and aldarate metabolism                            |      |      | 2.22 |
| 5-methyltetrahydrofolate (5MeTHF)                  | Cofactors and vitamins | Folate metabolism                                            | 0.50 |      |      |
| 1-methylnicotinamide                               | Cofactors and vitamins | Nicotinate and nicotinamide metabolism                       |      |      | 2.94 |
| nicotinamide                                       | Cofactors and vitamins | Nicotinate and nicotinamide metabolism                       | 0.24 |      | 2.70 |
| nicotinamide adenine dinucleotide (NAD+)           | Cofactors and vitamins | Nicotinate and nicotinamide metabolism                       |      | 0.22 |      |
| nicotinamide ribonucleotide (NMN)                  | Cofactors and vitamins | Nicotinate and nicotinamide metabolism                       |      | 0.15 |      |
| nicotinamide riboside*                             | Cofactors and vitamins | Nicotinate and nicotinamide metabolism                       | 0.47 |      |      |
| pantothenate                                       | Cofactors and vitamins | Pantothenate and CoA metabolism                              |      |      | 2.94 |
| pyridoxal                                          | Cofactors and vitamins | Pyridoxal metabolism                                         | 0.50 |      |      |
| flavin adenine dinucleotide (FAD)                  | Cofactors and vitamins | Riboflavin metabolism                                        | 0.41 |      |      |
| riboflavin (Vitamin B2)                            | Cofactors and vitamins | Riboflavin metabolism                                        |      |      | 2.17 |
| riboflavin (Vitamin B2)                            | Cofactors and vitamins | Riboflavin metabolism                                        | 0.51 |      |      |
| alpha-tocopherol                                   | Cofactors and vitamins | Tocopherol metabolism                                        | 0.32 |      |      |
| pyridoxate                                         | Cofactors and vitamins | Vitamin B6 metabolism                                        | 0.44 |      |      |
| citrate                                            | Energy                 | Krebs cycle                                                  |      | 3.13 | 2.17 |
| fumarate                                           | Energy                 | Krebs cycle                                                  | 0.50 |      | 2.22 |
| malate                                             | Energy                 | Krebs cycle                                                  | 0.42 |      | 4.55 |
| succinate                                          | Energy                 | Krebs cycle                                                  |      | 0.42 |      |
| succinylcarnitine                                  | Energy                 | Krebs cycle                                                  |      | 0.35 | 2.94 |
| phosphate                                          | Energy                 | Oxidative phosphorylation                                    |      |      | 3.13 |



|                                                   |        |                                              |       |      |      |
|---------------------------------------------------|--------|----------------------------------------------|-------|------|------|
| <b>pyrophosphate (PPi)</b>                        | Energy | Oxidative phosphorylation                    |       |      | 2.70 |
| <b>glycochenodeoxycholate</b>                     | Lipid  | Bile acid metabolism                         | 0.37  |      |      |
| <b>glycocholate</b>                               | Lipid  | Bile acid metabolism                         | 0.25  |      |      |
| <b>glycoursodeoxycholate</b>                      | Lipid  | Bile acid metabolism                         | 0.37  |      |      |
| <b>taurochenodeoxycholate</b>                     | Lipid  | Bile acid metabolism                         |       | 0.49 |      |
| <b>2-methylmalonyl carnitine</b>                  | Lipid  | Carnitine metabolism                         | 1.96  |      |      |
| <b>3-dehydrocarnitine*</b>                        | Lipid  | Carnitine metabolism                         |       |      | 2.56 |
| <b>acetylcarnitine</b>                            | Lipid  | Carnitine metabolism                         |       |      | 2.04 |
| <b>carnitine</b>                                  | Lipid  | Carnitine metabolism                         |       |      | 2.44 |
| <b>decanoylcarnitine</b>                          | Lipid  | Carnitine metabolism                         |       | 2.08 |      |
| <b>deoxycarnitine</b>                             | Lipid  | Carnitine metabolism                         | 2.08  |      | 3.57 |
| <b>glutaroyl carnitine</b>                        | Lipid  | Carnitine metabolism                         | 0.40  |      |      |
| <b>hexanoylcarnitine</b>                          | Lipid  | Carnitine metabolism                         | 4.35  | 2.63 | 2.70 |
| <b>octanoylcarnitine</b>                          | Lipid  | Carnitine metabolism                         |       | 2.44 |      |
| <b>oleoylcarnitine</b>                            | Lipid  | Carnitine metabolism                         |       |      | 3.03 |
| <b>palmitoylcarnitine</b>                         | Lipid  | Carnitine metabolism                         | 3.13  |      | 3.23 |
| <b>stearoylcarnitine</b>                          | Lipid  | Carnitine metabolism                         | 3.03  |      | 5.56 |
| <b>1,2-dipalmitoylglycerol</b>                    | Lipid  | Diacylglycerol                               |       | 0.45 |      |
| <b>prostaglandin E2</b>                           | Lipid  | Eicosanoid                                   |       | 2.63 |      |
| <b>dihomo-linolenate (20:3n3 or n6)</b>           | Lipid  | Essential fatty acid                         |       |      | 4.35 |
| <b>docosahexaenoate (DHA; 22:6n3)</b>             | Lipid  | Essential fatty acid                         |       |      | 3.13 |
| <b>docosapentaenoate (n3 DPA; 22:5n3)</b>         | Lipid  | Essential fatty acid                         | 0.52  |      | 4.17 |
| <b>docosapentaenoate (n6 DPA, 22:5n6)</b>         | Lipid  | Essential fatty acid                         | 2.17  |      | 2.27 |
| <b>eicosapentaenoate (EPA; 20:5n3)</b>            | Lipid  | Essential fatty acid                         |       |      | 2.63 |
| <b>linolenate [alpha or gamma; (18:3n3 or 6)]</b> | Lipid  | Essential fatty acid                         | 0.36  | 0.36 | 2.17 |
| <b>butyrylcarnitine</b>                           | Lipid  | Fatty acid metabolism (also BCAA metabolism) | 13.70 | 3.13 | 4.17 |
| <b>17-methylstearate</b>                          | Lipid  | Fatty acid, branched                         |       | 0.43 |      |
| <b>9,10-hydroxyoctadec-12(Z)-enoic acid</b>       | Lipid  | Fatty acid, dihydroxy                        |       | 0.40 |      |
| <b>palmitate, methyl ester</b>                    | Lipid  | Fatty acid, methyl ester                     |       | 0.51 |      |
| <b>13-HODE + 9-HODE</b>                           | Lipid  | Fatty acid, monohydroxy                      |       | 0.49 |      |
| <b>2-hydroxypalmitate</b>                         | Lipid  | Fatty acid, monohydroxy                      |       |      | 2.78 |
| <b>4-hydroxyphenylpyruvate</b>                    | Lipid  | Fatty acid, monohydroxy                      |       |      | 1.96 |
| <b>choline</b>                                    | Lipid  | Glycerolipid metabolism                      | 2.13  |      |      |
| <b>choline phosphate</b>                          | Lipid  | Glycerolipid metabolism                      |       |      | 2.70 |
| <b>cytidine 5'-diphosphocholine</b>               | Lipid  | Glycerolipid metabolism                      |       |      | 8.33 |
| <b>ethanolamine</b>                               | Lipid  | Glycerolipid metabolism                      |       |      | 4.17 |
| <b>glycerol</b>                                   | Lipid  | Glycerolipid metabolism                      | 0.44  | 0.39 | 2.27 |
| <b>glycerol 3-phosphate (G3P)</b>                 | Lipid  | Glycerolipid metabolism                      |       | 0.35 | 2.27 |
| <b>glycerophosphorylcholine (GPC)</b>             | Lipid  | Glycerolipid metabolism                      | 0.38  | 0.35 |      |
| <b>phosphoethanolamine</b>                        | Lipid  | Glycerolipid metabolism                      | 2.13  |      | 9.09 |
| <b>phosphopantetheine</b>                         | Lipid  | Glycerolipid metabolism                      | 0.54  |      |      |
| <b>inositol 1-phosphate (I1P)</b>                 | Lipid  | Inositol metabolism                          |       |      | 4.76 |
| <b>myo-inositol</b>                               | Lipid  | Inositol metabolism                          |       |      | 1.96 |
| <b>scyllo-inositol</b>                            | Lipid  | Inositol metabolism                          |       |      | 2.17 |
| <b>10-nonadecenoate (19:1n9)</b>                  | Lipid  | Long chain fatty acid                        |       | 0.46 | 2.70 |
| <b>adrenate (22:4n6)</b>                          | Lipid  | Long chain fatty acid                        |       |      | 4.35 |
| <b>arachidonate (20:4n6)</b>                      | Lipid  | Long chain fatty acid                        |       |      | 4.35 |
| <b>cis-vaccenate (18:1n7)</b>                     | Lipid  | Long chain fatty acid                        |       |      | 2.38 |
| <b>dihomo-linoleate (20:2n6)</b>                  | Lipid  | Long chain fatty acid                        |       | 0.50 | 3.57 |
| <b>docosadienoate (22:2n6)</b>                    | Lipid  | Long chain fatty acid                        | 2.08  |      | 4.55 |
| <b>docosatrenoate (22:3n3)</b>                    | Lipid  | Long chain fatty acid                        |       |      | 4.35 |
| <b>eicosenoate (20:1n9 or 11)</b>                 | Lipid  | Long chain fatty acid                        |       | 0.42 | 3.45 |
| <b>linoleate (18:2n6)</b>                         | Lipid  | Long chain fatty acid                        |       | 0.51 | 1.96 |

|                                                 |            |                                                      |  |      |      |
|-------------------------------------------------|------------|------------------------------------------------------|--|------|------|
| margarate (17:0)                                | Lipid      | Long chain fatty acid                                |  | 0.48 | 2.00 |
| myristate (14:0)                                | Lipid      | Long chain fatty acid                                |  | 0.52 |      |
| myristoleate (14:1n5)                           | Lipid      | Long chain fatty acid                                |  | 0.40 | 1.96 |
| nonadecanoate (19:0)                            | Lipid      | Long chain fatty acid                                |  | 0.53 |      |
| oleate (18:1n9)                                 | Lipid      | Long chain fatty acid                                |  |      | 2.70 |
| palmitate (16:0)                                | Lipid      | Long chain fatty acid                                |  |      | 1.96 |
| palmitoleate (16:1n7)                           | Lipid      | Long chain fatty acid                                |  | 0.53 | 2.08 |
| stearidonate (18:4n3)                           | Lipid      | Long chain fatty acid                                |  |      | 2.04 |
| 1-oleoylglycerophosphocholine                   | Lipid      | Lysolipid                                            |  |      | 4.35 |
| 1-oleoylglycerophosphoethanolamine              | Lipid      | Lysolipid                                            |  |      | 2.13 |
| 1-oleoylglycerophosphoinositol*                 | Lipid      | Lysolipid                                            |  | 0.22 |      |
| 1-palmitoylglycerophosphocholine                | Lipid      | Lysolipid                                            |  |      | 7.14 |
| 1-palmitoylglycerophosphoinositol*              | Lipid      | Lysolipid                                            |  | 0.22 |      |
| 1-palmitoylplasmenylethanolamine                | Lipid      | Lysolipid                                            |  |      | 4.55 |
| 1-stearoylglycerophosphocholine                 | Lipid      | Lysolipid                                            |  |      | 7.14 |
| 1-stearoylglycerophosphoethanolamine            | Lipid      | Lysolipid                                            |  |      | 4.00 |
| 1-stearoylglycerophosphoinositol                | Lipid      | Lysolipid                                            |  |      | 2.78 |
| 2-arachidonoylglycerophosphocholine*            | Lipid      | Lysolipid                                            |  |      | 5.00 |
| 2-arachidonoylglycerophosphoethanolamine*       | Lipid      | Lysolipid                                            |  |      | 2.86 |
| 2-docosaehaenoylglycerophosphoethanolamine*     | Lipid      | Lysolipid                                            |  |      | 3.45 |
| 2-docosapentaenoylglycerophosphoethanolamine*   | Lipid      | Lysolipid                                            |  |      | 4.35 |
| 2-linoleoylglycerophosphocholine*               | Lipid      | Lysolipid                                            |  |      | 2.78 |
| 2-linoleoylglycerophosphoethanolamine*          | Lipid      | Lysolipid                                            |  |      | 2.22 |
| 2-oleoylglycerophosphocholine*                  | Lipid      | Lysolipid                                            |  |      | 3.85 |
| 2-oleoylglycerophosphoethanolamine*             | Lipid      | Lysolipid                                            |  |      | 4.00 |
| 2-palmitoleoylglycerophosphocholine*            | Lipid      | Lysolipid                                            |  |      | 3.13 |
| 2-palmitoylglycerophosphocholine*               | Lipid      | Lysolipid                                            |  |      | 4.17 |
| 5-dodecenoate (12:1n7)                          | Lipid      | Medium chain fatty acid                              |  | 0.51 |      |
| laurate (12:0)                                  | Lipid      | Medium chain fatty acid                              |  | 0.47 |      |
| 1-docosaehaenoylglycerol (1-monodocosaehaenoin) | Lipid      | Monoacylglycerol                                     |  | 0.31 |      |
| 1-myristoylglycerol (1-monomyristin)            | Lipid      | Monoacylglycerol                                     |  | 0.09 |      |
| 1-oleoylglycerol (1-monoolein)                  | Lipid      | Monoacylglycerol                                     |  | 0.33 | 5.00 |
| 1-palmitoylglycerol (1-monopalmitin)            | Lipid      | Monoacylglycerol                                     |  | 0.32 | 3.45 |
| 1-pentadecanoylglycerol (1-monopentadecanoin)   | Lipid      | Monoacylglycerol                                     |  | 0.34 |      |
| 1-stearoylglycerol (1-monostearin)              | Lipid      | Monoacylglycerol                                     |  | 0.24 | 4.55 |
| 2-linoleoylglycerol (2-monolinolein)            | Lipid      | Monoacylglycerol                                     |  | 0.22 |      |
| 2-myristoylglycerol (2-monomyristin)            | Lipid      | Monoacylglycerol                                     |  | 0.18 |      |
| 2-oleoylglycerol (2-monoolein)                  | Lipid      | Monoacylglycerol                                     |  | 0.51 |      |
| 2-palmitoylglycerol (2-monopalmitin)            | Lipid      | Monoacylglycerol                                     |  | 0.13 |      |
| palmitoyl sphingomyelin                         | Lipid      | Sphingolipid                                         |  |      | 2.44 |
| sphinganine                                     | Lipid      | Sphingolipid                                         |  |      | 6.25 |
| sphingosine                                     | Lipid      | Sphingolipid                                         |  |      | 2.56 |
| stearoyl sphingomyelin                          | Lipid      | Sphingolipid                                         |  | 0.50 |      |
| 7-beta-hydroxycholesterol                       | Lipid      | Sterol/Steroid                                       |  | 2.08 |      |
| hypoxanthine                                    | Nucleotide | Purine metabolism, (hypo)xanthine/inosine containing |  |      | 2.33 |
| xanthosine                                      | Nucleotide | Purine metabolism, (hypo)xanthine/inosine containing |  | 0.18 | 2.44 |
| adenine                                         | Nucleotide | Purine metabolism, adenine containing                |  | 2.50 |      |
| adenosine                                       | Nucleotide | Purine metabolism, adenine containing                |  |      | 2.78 |
| adenosine 2'-monophosphate (2'-AMP)             | Nucleotide | Purine metabolism, adenine containing                |  | 0.39 |      |
| adenosine 3',5'-diphosphate                     | Nucleotide | Purine metabolism, adenine containing                |  | 0.37 |      |
| adenosine 3'-monophosphate (3'-AMP)             | Nucleotide | Purine metabolism, adenine containing                |  | 0.39 |      |
| adenosine 3'-monophosphate (3'-AMP)             | Nucleotide | Purine metabolism, adenine containing                |  |      | 2.27 |
| adenosine 5'-monophosphate (AMP)                | Nucleotide | Purine metabolism, adenine containing                |  | 0.30 |      |

|                                           |             |                                            |      |      |      |
|-------------------------------------------|-------------|--------------------------------------------|------|------|------|
| <b>N1-methyladenosine</b>                 | Nucleotide  | Purine metabolism, adenine containing      |      |      | 2.27 |
| <b>guanine</b>                            | Nucleotide  | Purine metabolism, guanine containing      |      |      | 3.03 |
| <b>guanosine</b>                          | Nucleotide  | Purine metabolism, guanine containing      |      |      | 3.13 |
| urate                                     | Nucleotide  | Purine metabolism, urate metabolism        | 0.47 |      | 6.25 |
| <b>cytidine</b>                           | Nucleotide  | Pyrimidine metabolism, cytidine containing |      | 0.38 |      |
| <b>cytidine 5'-monophosphate (5'-CMP)</b> | Nucleotide  | Pyrimidine metabolism, cytidine containing |      |      | 2.38 |
| 5,6-dihydrouracil                         | Nucleotide  | Pyrimidine metabolism, uracil containing   | 3.57 |      | 2.13 |
| <b>pseudouridine</b>                      | Nucleotide  | Pyrimidine metabolism, uracil containing   |      |      | 2.17 |
| <b>uracil</b>                             | Nucleotide  | Pyrimidine metabolism, uracil containing   |      |      | 4.55 |
| <b>uridine</b>                            | Nucleotide  | Pyrimidine metabolism, uracil containing   |      |      | 2.27 |
| <b>aspartylleucine</b>                    | Peptide     | Dipeptide                                  |      |      | 9.09 |
| <b>glycylproline</b>                      | Peptide     | Dipeptide                                  |      |      | 2.04 |
| <b>isoleucylisoleucine</b>                | Peptide     | Dipeptide                                  |      | 3.23 |      |
| <b>pro-hydroxy-pro</b>                    | Peptide     | Dipeptide                                  |      | 2.22 |      |
| <b>threonylphenylalanine</b>              | Peptide     | Dipeptide                                  |      | 2.56 |      |
| gamma-glutamylglutamate                   | Peptide     | gamma-glutamyl                             | 0.27 |      | 2.50 |
| <b>gamma-glutamylleucine</b>              | Peptide     | gamma-glutamyl                             |      |      | 2.56 |
| <b>gamma-glutamylglutamine</b>            | Peptide     | g-glutamyl                                 | 0.30 |      |      |
| <b>gamma-glutamylmethionine*</b>          | Peptide     | g-glutamyl                                 | 0.42 |      |      |
| <b>gamma-glutamyltyrosine</b>             | Peptide     | g-glutamyl                                 | 0.53 |      |      |
| <b>VGAHAGEYGAEALER*</b>                   | Peptide     | Polypeptide                                | 0.23 |      |      |
| <b>hippurate</b>                          | Xenobiotics | Benzoate metabolism                        | 0.41 |      |      |
| glycerol 2-phosphate                      | Xenobiotics | Chemical                                   | 0.25 |      | 2.04 |
| <b>N-ethylglycinexylidide*</b>            | Xenobiotics | Drug                                       |      | 0.53 |      |
| <b>ergothioneine</b>                      | Xenobiotics | Plant                                      |      |      | 2.27 |
| <b>erythritol</b>                         | Xenobiotics | Sugar, sugar substitute, starch            | 0.47 |      |      |
| <b>galacturonate</b>                      | Xenobiotics | Sugar, sugar substitute, starch            | 0.49 |      |      |

Abbreviations: FC: Fold Change; T: tumor; NT: nontumor

Red: Abundant in tumor; Blue: Abundant in nontumor

Metabolites in bold are unique

**Supplemental Table 6: Tumor and Cancer Specific Metabolites**

| <b>LIVER*</b>                     | <b>TUMOR**</b> | <b>NONTUMOR**</b> | <b>FC***</b> |
|-----------------------------------|----------------|-------------------|--------------|
| urocanate                         | 40659.08       | 18028.14          | <b>2.26</b>  |
| phosphopantetheine                | 31849.95       | 48295.13          | <b>0.66</b>  |
| 5-methyltetrahydrofolate (5MeTHF) | 7141.31        | 14246.60          | <b>0.50</b>  |
| galacturonate                     | 265826.73      | 539625.87         | <b>0.49</b>  |
| nicotinamide riboside*            | 3165759.00     | 6702463.37        | <b>0.47</b>  |
| glutaroyl carnitine               | 64350.48       | 160229.84         | <b>0.40</b>  |
| adenosine 3',5'-diphosphate       | 26555.38       | 71919.40          | <b>0.37</b>  |
| gulono-1,4-lactone                | 104870.79      | 360242.78         | <b>0.29</b>  |
| tagatose                          | 104964.12      | 390381.91         | <b>0.27</b>  |

| <b>PANCREAS</b>                                   | <b>TUMOR</b> | <b>NONTUMOR</b> | <b>FC</b>   |
|---------------------------------------------------|--------------|-----------------|-------------|
| isoleucylleucine                                  | 48932.50     | 15329.26        | <b>3.19</b> |
| prostaglandin E2                                  | 9370.14      | 3596.63         | <b>2.61</b> |
| pro-hydroxy-pro                                   | 324715.29    | 144824.62       | <b>2.24</b> |
| decanoylcarnitine                                 | 48411.18     | 23244.56        | <b>2.08</b> |
| nonadecanoate (19:0)                              | 231055.77    | 440188.07       | <b>0.52</b> |
| palmitate, methyl ester                           | 44492.64     | 88156.48        | <b>0.50</b> |
| 13-HODE + 9-HODE                                  | 355554.34    | 725568.67       | <b>0.49</b> |
| taurodeoxycholate                                 | 3676.80      | 7568.63         | <b>0.49</b> |
| 17-methylstearate                                 | 99147.01     | 229072.08       | <b>0.43</b> |
| 9,10-hydroxyoctadec-12(Z)-enoic acid              | 15689.83     | 39399.28        | <b>0.40</b> |
| 1-pentadecanoylglycerol (1-monopentadecanoin)     | 17550.71     | 51064.91        | <b>0.34</b> |
| 1-docosahexaenoylglycerol (1-monodocosahexaenoin) | 7733.67      | 24589.60        | <b>0.31</b> |
| guanidinoacetate                                  | 32019.91     | 124774.01       | <b>0.26</b> |
| 2-linoleoylglycerol (2-monolinolein)              | 10234.91     | 47673.76        | <b>0.21</b> |
| 2-myristoylglycerol (2-monomyristin)              | 31612.10     | 174590.85       | <b>0.18</b> |
| 1-myristoylglycerol (1-monomyristin)              | 108955.66    | 1242653.04      | <b>0.09</b> |

| <b>BREAST</b>                                | <b>TUMOR</b> | <b>NONTUMOR</b> | <b>FC</b>   |
|----------------------------------------------|--------------|-----------------|-------------|
| 2-docosahexaenoylglycerophosphoethanolamine* | 145964.86    | 42545.76        | <b>3.43</b> |
| N6-acetyllysine                              | 87503.55     | 27750.20        | <b>3.15</b> |
| 1-methylnicotinamide                         | 112630.05    | 38100.52        | <b>2.96</b> |
| pyrophosphate (PPi)                          | 30727.21     | 11347.00        | <b>2.71</b> |
| 1-palmitoylplasmylethanolamine               | 65251.76     | 25597.64        | <b>2.55</b> |
| palmitoyl sphinomyelin                       | 1853678.99   | 756591.68       | <b>2.45</b> |
| hydroxyisovaleroyl carnitine                 | 71642.63     | 30895.24        | <b>2.32</b> |
| threonate                                    | 19053.90     | 8615.93         | <b>2.21</b> |
| S-adenosylmethionine (SAM)                   | 14091.79     | 7238.30         | <b>1.95</b> |

\* Metabolites are ordered from most abundant in tumor to least abundant in tumor

\*\* The relative abundance in tumor or nontumor tissue is shown (mean value)

\*\*\* FC: Fold Change (Tumor versus Nontumor abundance)

Supplemental Table 7: Differentially abundant metabolites in early stage liver cancer

| Metabolite                                                              | Super Pathway          | Sub Pathway                                                  | Parametric p-value | Permutation p-value | FC TvsNT     |
|-------------------------------------------------------------------------|------------------------|--------------------------------------------------------------|--------------------|---------------------|--------------|
| <b>N-acetylasparagine</b>                                               | Amino acid             | Alanine and aspartate metabolism                             | 0.029              | 0.063               | <b>1.89</b>  |
| N-acetylaspartate (NAA)                                                 | Amino acid             | Alanine and aspartate metabolism                             | 0.031              | 0.031               | <b>1.61</b>  |
| <b>cysteine</b>                                                         | Amino acid             | Cysteine, methionine, SAM, taurine metabolism                | 0.009              | 0.012               | <b>0.37</b>  |
| S-adenosylhomocysteine (SAH)                                            | Amino acid             | Cysteine, methionine, SAM, taurine metabolism                | 0.012              | 0.018               | <b>0.47</b>  |
| <b>gamma-aminobutyrate (GABA)</b>                                       | Amino acid             | Glutamate metabolism                                         | 0.043              | 0.051               | <b>0.43</b>  |
| <b>serine</b>                                                           | Amino acid             | Glycine, serine and threonine metabolism                     | 0.040              | 0.031               | <b>1.64</b>  |
| <b>urocanate</b>                                                        | Amino acid             | Histidine metabolism                                         | 0.033              | 0.125               | <b>2.04</b>  |
| <b>phenylacetylglutamine</b>                                            | Amino acid             | Phenylalanine & tyrosine metabolism                          | 0.006              | 0.063               | <b>0.40</b>  |
| <b>5-methylthioadenosine (MTA)</b>                                      | Amino acid             | Polyamine metabolism                                         | 0.012              | 0.016               | <b>2.86</b>  |
| kynurenine                                                              | Amino acid             | Tryptophan metabolism                                        | 0.014              | 0.020               | <b>2.27</b>  |
| <b>isobutyrylcarnitine</b>                                              | Amino acid             | Valine, leucine and isoleucine metabolism                    | 0.005              | 0.010               | <b>0.32</b>  |
| <b>valerylcarnitine</b>                                                 | Amino acid             | Valine, leucine and isoleucine metabolism                    | 0.004              | 0.008               | <b>5.56</b>  |
| <b>N-acetylmannosamine</b>                                              | Carbohydrate           | Aminosugars metabolism                                       | 0.050              | 0.043               | <b>0.55</b>  |
| <b>mannose</b>                                                          | Carbohydrate           | Fructose, mannose, galactose, starch, and sucrose metabolism | 0.013              | 0.014               | <b>0.53</b>  |
| <b>sorbitol</b>                                                         | Carbohydrate           | Fructose, mannose, galactose, starch, and sucrose metabolism | 0.002              | 0.004               | <b>0.44</b>  |
| <b>tagatose</b>                                                         | Carbohydrate           | Fructose, mannose, galactose, starch, and sucrose metabolism | 0.018              | 0.016               | <b>0.27</b>  |
| <b>glucose</b>                                                          | Carbohydrate           | Glycolysis, gluconeogenesis, pyruvate metabolism             | 0.002              | 0.002               | <b>0.49</b>  |
| <b>glucuronate</b>                                                      | Carbohydrate           | Glycolysis, gluconeogenesis, pyruvate metabolism             | <0.0001            | 0.002               | <b>0.35</b>  |
| <b>Isobar: fructose 1,6-diphosphate, glucose 1,6-6-phosphogluconate</b> | Carbohydrate           | Glycolysis, gluconeogenesis, pyruvate metabolism             | 0.030              | 0.035               | <b>2.38</b>  |
| <b>ribitol</b>                                                          | Carbohydrate           | Nucleotide sugars, pentose metabolism                        | 0.011              | 0.031               | <b>0.44</b>  |
| <b>ribose 5-phosphate</b>                                               | Carbohydrate           | Nucleotide sugars, pentose metabolism                        | 0.038              | 0.041               | <b>0.42</b>  |
| <b>UDP-glucose</b>                                                      | Carbohydrate           | Nucleotide sugars, pentose metabolism                        | 0.030              | 0.063               | <b>0.45</b>  |
| <b>xylitol</b>                                                          | Carbohydrate           | Nucleotide sugars, pentose metabolism                        | 0.013              | 0.063               | <b>0.45</b>  |
| <b>glucarate (saccharate)</b>                                           | Carbohydrate           | Nucleotide sugars, pentose metabolism                        | 0.021              | 0.027               | <b>0.38</b>  |
| <b>gulono-1,4-lactone</b>                                               | Cofactors and vitamins | Ascorbate and aldarate metabolism                            | <0.0001            | 0.002               | <b>0.35</b>  |
| <b>nicotinamide</b>                                                     | Cofactors and vitamins | Ascorbate and aldarate metabolism                            | 0.007              | 0.010               | <b>0.29</b>  |
| <b>nicotinamide adenine dinucleotide reduced</b>                        | Cofactors and vitamins | Nicotinate and nicotinamide metabolism                       | 0.002              | 0.063               | <b>0.22</b>  |
| <b>nicotinamide riboside*</b>                                           | Cofactors and vitamins | Nicotinate and nicotinamide metabolism                       | 0.026              | 0.125               | <b>0.34</b>  |
| <b>phosphopantetheine</b>                                               | Cofactors and vitamins | Nicotinate and nicotinamide metabolism                       | <0.0001            | 0.002               | <b>0.52</b>  |
| <b>flavin adenine dinucleotide (FAD)</b>                                | Cofactors and vitamins | Pantothenate and CoA metabolism                              | 0.020              | 0.063               | <b>0.44</b>  |
| <b>alpha-tocopherol</b>                                                 | Cofactors and vitamins | Riboflavin metabolism                                        | 0.014              | 0.016               | <b>0.49</b>  |
| <b>malate</b>                                                           | Cofactors and vitamins | Tocopherol metabolism                                        | 0.024              | 0.094               | <b>0.40</b>  |
| <b>2-methylmalonyl carnitine</b>                                        | Energy                 | Krebs cycle                                                  | 0.001              | 0.004               | <b>0.51</b>  |
| <b>3-dehydrocarnitine*</b>                                              | Lipid                  | Carnitine metabolism                                         | 0.008              | 0.020               | <b>2.33</b>  |
| <b>butyrylcarnitine</b>                                                 | Lipid                  | Carnitine metabolism                                         | 0.007              | 0.012               | <b>1.85</b>  |
| <b>deoxycarnitine</b>                                                   | Lipid                  | Carnitine metabolism                                         | 0.001              | 0.004               | <b>12.82</b> |
| <b>glutaroyl carnitine</b>                                              | Lipid                  | Carnitine metabolism                                         | 0.002              | 0.004               | <b>2.86</b>  |
| <b>hexanoylcarnitine</b>                                                | Lipid                  | Carnitine metabolism                                         | 0.021              | 0.025               | <b>0.46</b>  |
| <b>docosapentaenoate (n3 DPA; 22:5n3)</b>                               | Lipid                  | Carnitine metabolism                                         | 0.007              | 0.006               | <b>4.76</b>  |
| <b>eicosapentaenoate (EPA; 20:5n3)</b>                                  | Lipid                  | Essential fatty acid                                         | 0.020              | 0.016               | <b>0.53</b>  |
| <b>linolenate [alpha or gamma; (18:3n3 or 6)]</b>                       | Lipid                  | Essential fatty acid                                         | 0.026              | 0.016               | <b>0.53</b>  |
| <b>sedoheptulose-7-phosphate</b>                                        | Lipid                  | Essential fatty acid                                         | 0.049              | 0.039               | <b>0.42</b>  |
| <b>choline</b>                                                          | Lipid                  | Fatty acid, dicarboxylate                                    | 0.004              | 0.063               | <b>0.35</b>  |
| <b>glycerol</b>                                                         | Lipid                  | Glycerolipid metabolism                                      | 0.030              | 0.031               | <b>2.27</b>  |
| <b>glycerophosphorylcholine (GPC)</b>                                   | Lipid                  | Glycerolipid metabolism                                      | 0.022              | 0.029               | <b>0.43</b>  |
| <b>phosphoethanolamine</b>                                              | Lipid                  | Glycerolipid metabolism                                      | 0.011              | 0.010               | <b>0.31</b>  |
| <b>scyllo-inositol</b>                                                  | Lipid                  | Glycerolipid metabolism                                      | <0.0001            | 0.002               | <b>2.63</b>  |
| <b>adrenate (22:4n6)</b>                                                | Lipid                  | Inositol metabolism                                          | <0.0001            | 0.004               | <b>0.51</b>  |
|                                                                         | Lipid                  | Long chain fatty acid                                        | 0.010              | 0.031               | <b>1.96</b>  |

|                                             |             |                                                                                       |         |       |             |
|---------------------------------------------|-------------|---------------------------------------------------------------------------------------|---------|-------|-------------|
| <b>dihomo-linoleate (20:2n6)</b>            | Lipid       | Long chain fatty acid                                                                 | 0.020   | 0.094 | <b>2.08</b> |
| <b>docosadienoate (22:2n6)</b>              | Lipid       | Long chain fatty acid                                                                 | 0.003   | 0.031 | <b>3.33</b> |
| <b>docosapentaenoate (n6 DPA, 22:5n6)</b>   | Lipid       | Long chain fatty acid                                                                 | 0.004   | 0.008 | <b>2.63</b> |
| docosatrienoate (22:3n3)                    | Lipid       | Long chain fatty acid                                                                 | 0.016   | 0.094 | <b>3.45</b> |
| <b>eicosenoate (20:1n9 or 11)</b>           | Lipid       | Long chain fatty acid                                                                 | 0.008   | 0.063 | <b>2.94</b> |
| 1-oleoylglycerophosphoinositol*             | Lipid       | Lysolipid                                                                             | 0.025   | 0.063 | <b>2.17</b> |
| <b>2-arachidonoylglycerophosphocholine*</b> | Lipid       | Lysolipid                                                                             | 0.016   | 0.031 | <b>0.42</b> |
| <b>2-linoleoylglycerophosphocholine*</b>    | Lipid       | Lysolipid                                                                             | 0.042   | 0.125 | <b>0.43</b> |
| <b>caproate (6:0)</b>                       | Lipid       | Medium chain fatty acid                                                               | 0.028   | 0.033 | <b>1.69</b> |
| <b>phytosphingosine</b>                     | Lipid       | Sphingolipid                                                                          | 0.027   | 0.125 | <b>0.38</b> |
| sphingosine                                 | Lipid       | Sphingolipid                                                                          | 0.028   | 0.031 | <b>0.53</b> |
| <b>7-beta-hydroxycholesterol</b>            | Lipid       | Sterol/Steroid                                                                        | 0.032   | 0.033 | <b>2.22</b> |
| squalene                                    | Lipid       | Sterol/Steroid                                                                        | 0.012   | 0.031 | <b>0.44</b> |
| <b>xanthosine</b>                           | Nucleotide  | Purine metabolism, (hypo)xanthine/inosine containing                                  | 0.001   | 0.006 | <b>0.23</b> |
| <b>adenine</b>                              | Nucleotide  | Purine metabolism, adenine containing                                                 | 0.019   | 0.023 | <b>2.00</b> |
| <b>adenosine</b>                            | Nucleotide  | Purine metabolism, adenine containing                                                 | 0.045   | 0.047 | <b>0.51</b> |
| <b>adenosine 2'-monophosphate (2'-AMP)</b>  | Nucleotide  | Purine metabolism, adenine containing                                                 | 0.010   | 0.014 | <b>0.43</b> |
| <b>adenosine 3',5'-diphosphate</b>          | Nucleotide  | Purine metabolism, adenine containing                                                 | 0.003   | 0.063 | <b>0.27</b> |
| <b>adenosine 5'-monophosphate (AMP)</b>     | Nucleotide  | Purine metabolism, adenine containing                                                 | 0.032   | 0.033 | <b>0.31</b> |
| <b>3-aminoisobutyrate</b>                   | Nucleotide  | Pyrimidine metabolism, thymine containing; Valine, leucine and isoleucine metabolism/ | 0.013   | 0.094 | <b>3.33</b> |
| <b>5,6-dihydrouracil</b>                    | Nucleotide  | Pyrimidine metabolism, uracil containing                                              | 0.004   | 0.006 | <b>3.85</b> |
| beta-alanine                                | Nucleotide  | Pyrimidine metabolism, uracil containing                                              | 0.009   | 0.014 | <b>0.47</b> |
| <b>aspartylleucine</b>                      | Peptide     | Dipeptide                                                                             | 0.024   | 0.023 | <b>0.38</b> |
| <b>glycylleucine</b>                        | Peptide     | Dipeptide                                                                             | 0.012   | 0.016 | <b>0.50</b> |
| <b>lysylleucine</b>                         | Peptide     | Dipeptide                                                                             | 0.031   | 0.063 | <b>0.52</b> |
| <b>prolylleucine</b>                        | Peptide     | Dipeptide                                                                             | 0.001   | 0.004 | <b>0.51</b> |
| <b>gamma-glutamylglutamate</b>              | Peptide     | g-glutamyl                                                                            | 0.005   | 0.010 | <b>0.22</b> |
| <b>gamma-glutamylglutamine</b>              | Peptide     | g-glutamyl                                                                            | 0.031   | 0.039 | <b>0.18</b> |
| <b>gamma-glutamylmethionine*</b>            | Peptide     | g-glutamyl                                                                            | 0.001   | 0.004 | <b>0.29</b> |
| <b>gamma-glutamyltyrosine</b>               | Peptide     | g-glutamyl                                                                            | <0.0001 | 0.002 | <b>0.54</b> |
| <b>cysteine-glutathione disulfide</b>       | Peptide     | Glutathione metabolism                                                                | 0.026   | 0.035 | <b>0.20</b> |
| <b>glutathione, oxidized (GSSG)</b>         | Peptide     | Glutathione metabolism                                                                | 0.011   | 0.063 | <b>0.18</b> |
| <b>glutathione, reduced (GSH)</b>           | Peptide     | Glutathione metabolism                                                                | <0.0001 | 0.031 | <b>0.03</b> |
| <b>ophthalmate*</b>                         | Peptide     | Glutathione metabolism                                                                | 0.001   | 0.031 | <b>0.04</b> |
| <b>S-methylglutathione</b>                  | Peptide     | Glutathione metabolism                                                                | 0.002   | 0.063 | <b>0.16</b> |
| <b>VGAHAGEYGAEALER*</b>                     | Peptide     | Polypeptide                                                                           | 0.012   | 0.006 | <b>0.31</b> |
| <b>hippurate</b>                            | Xenobiotics | Benzoate metabolism                                                                   | 0.009   | 0.063 | <b>0.26</b> |
| <b>glycerol 2-phosphate</b>                 | Xenobiotics | Chemical                                                                              | 0.001   | 0.004 | <b>0.26</b> |
| <b>erythritol</b>                           | Xenobiotics | Sugar, sugar substitute, starch                                                       | <0.0001 | 0.002 | <b>0.39</b> |
| <b>galacturonate</b>                        | Xenobiotics | Sugar, sugar substitute, starch                                                       | <0.0001 | 0.002 | <b>0.38</b> |

Abbreviations: FC: Fold Change; T: tumor; NT: nontumor

Red: Abundant in tumor; Blue: Abundant in nontumor

Metabolites in bold are unique to liver cancer

Supplemental Table 8: Differentially abundant metabolites in early stage pancreas cancer

| Metabolite                                   | Super Pathway          | Sub Pathway                                   | Parametric p-value | Permutation p-value | FC TvsNT |
|----------------------------------------------|------------------------|-----------------------------------------------|--------------------|---------------------|----------|
| <b>aspartate</b>                             | Amino acid             | Alanine and aspartate metabolism              | 0.004              | 0.016               | 0.42     |
| <b>2-aminobutyrate</b>                       | Amino acid             | Butanoate metabolism                          | 0.041              | 0.047               | 0.53     |
| <b>cystine</b>                               | Amino acid             | Cysteine, methionine, SAM, taurine metabolism | 0.007              | 0.016               | 0.48     |
| <b>N-acetyl-aspartyl-glutamate (NAAG)</b>    | Amino acid             | Glutamate metabolism                          | 0.033              | 0.047               | 0.41     |
| <b>kynurenine</b>                            | Amino acid             | Tryptophan metabolism                         | 0.007              | 0.016               | 2.78     |
| <b>isovalerylcarnitine</b>                   | Amino acid             | Valine, leucine and isoleucine metabolism     | 0.022              | 0.016               | 3.03     |
| <b>nicotinamide ribonucleotide (NMN)</b>     | Cofactors and vitamins | Nicotinate and nicotinamide metabolism        | 0.011              | 0.031               | 0.05     |
| <b>pantothenate</b>                          | Cofactors and vitamins | Pantothenate and CoA metabolism               | 0.009              | 0.016               | 0.51     |
| <b>alpha-ketoglutarate</b>                   | Energy                 | Krebs cycle                                   | 0.035              | 0.031               | 2.13     |
| <b>fumarate</b>                              | Energy                 | Krebs cycle                                   | 0.048              | 0.047               | 0.51     |
| <b>hexanoylcarnitine</b>                     | Lipid                  | Carnitine metabolism                          | 0.009              | 0.031               | 2.70     |
| <b>octanoylcarnitine</b>                     | Lipid                  | Carnitine metabolism                          | 0.015              | 0.016               | 2.13     |
| <b>decanoylcarnitine</b>                     | Lipid                  | Carnitine metabolism                          | 0.028              | 0.063               | 1.96     |
| <b>succinylcarnitine</b>                     | Lipid                  | Carnitine metabolism                          | 0.037              | 0.063               | 0.28     |
| <b>butyrylcarnitine</b>                      | Lipid                  | Fatty acid metabolism (also BCAA metabolism)  | 0.022              | 0.047               | 2.63     |
| <b>glycerol 3-phosphate (G3P)</b>            | Lipid                  | Glycerolipid metabolism                       | 0.021              | 0.016               | 0.30     |
| <b>docosatrienoate (22:3n3)</b>              | Lipid                  | Long chain fatty acid                         | 0.045              | 0.016               | 0.39     |
| <b>1-palmitoylglycerophosphoethanolamine</b> | Lipid                  | Lysolipid                                     | 0.001              | 0.016               | 0.52     |
| <b>1-oleoylglycerophosphoethanolamine</b>    | Lipid                  | Lysolipid                                     | 0.011              | 0.016               | 0.48     |
| <b>1-oleoylglycerophosphoinositol*</b>       | Lipid                  | Lysolipid                                     | 0.010              | 0.016               | 0.38     |
| <b>stearoyl sphingomyelin</b>                | Lipid                  | Sphingolipid                                  | 0.034              | 0.047               | 0.45     |
| <b>cytidine</b>                              | Nucleotide             | Pyrimidine metabolism, cytidine containing    | 0.020              | 0.031               | 0.24     |
| <b>phenol red</b>                            | Xenobiotics            | Chemical                                      | 0.047              | 0.031               | 2.04     |

Abbreviations: FC: Fold Change; T: tumor; NT: nontumor

Red: Abundant in tumor; Blue: Abundant in nontumor

Metabolites in bold are unique to pancreatic cancer

Supplemental Table 9: Differentially abundant metabolites in early stage breast cancer

| Metabolite                          | Super Pathway | Sub Pathway                                   | Parametric p-value | Permutation p-value | FC TvsNT     |
|-------------------------------------|---------------|-----------------------------------------------|--------------------|---------------------|--------------|
| <b>beta-alanine</b>                 | Amino acid    | Alanine and aspartate metabolism              | 0.046              | 0.063               | <b>2.17</b>  |
| <b>N-acetylaspartate (NAA)</b>      | Amino acid    | Alanine and aspartate metabolism              | 0.036              | 0.125               | <b>6.67</b>  |
| <b>N-acetylmethionine</b>           | Amino acid    | Cysteine, methionine, SAM, taurine metabolism | 0.019              | 0.031               | <b>2.63</b>  |
| <b>S-adenosylhomocysteine (SAH)</b> | Amino acid    | Cysteine, methionine, SAM, taurine metabolism | 0.021              | 0.063               | <b>1.96</b>  |
| <b>taurine</b>                      | Amino acid    | Cysteine, methionine, SAM, taurine metabolism | 0.042              | 0.063               | <b>2.70</b>  |
| <b>betaine</b>                      | Amino acid    | Glycine, serine and threonine metabolism      | 0.034              | 0.031               | <b>2.38</b>  |
| <b>N-acetylthreonine</b>            | Amino acid    | Glycine, serine and threonine metabolism      | 0.041              | 0.063               | <b>2.08</b>  |
| <b>tryptophan betaine</b>           | Amino acid    | Tryptophan metabolism                         | 0.032              | 0.063               | <b>2.04</b>  |
| <b>pyrophosphate (PPi)</b>          | Energy        | Oxidative phosphorylation                     | 0.040              | 0.063               | <b>10.00</b> |
| <b>3-hydroxybutyrate (BHBA)</b>     | Lipid         | Ketone bodies                                 | 0.019              | 0.031               | <b>2.17</b>  |
| <b>ergothioneine</b>                | Xenobiotics   | Plant                                         | 0.049              | 0.125               | <b>1.85</b>  |

Abbreviations: FC: Fold Change; T: tumor; NT: nontumor

Red: Abundant in tumor; Blue: Abundant in nontumor

Metabolites in bold are unique to breast cancer



Supplemental Table 10: Comparison of Tumor and Cancer Specific Metabolites at Early-Stage

| Metabolite                                       | Super Pathway          | Sub Pathway                                                  | Liver    | Pancreas | Breast   |
|--------------------------------------------------|------------------------|--------------------------------------------------------------|----------|----------|----------|
|                                                  |                        |                                                              | FC TvsNT | FC TvsNT | FC TvsNT |
| aspartate                                        | Amino acid             | Alanine and aspartate metabolism                             |          | 0.42     |          |
| N-acetylasparagine                               | Amino acid             | Alanine and aspartate metabolism                             | 1.89     |          |          |
| N-acetylaspartate (NAA)                          | Amino acid             | Alanine and aspartate metabolism                             | 1.61     |          | 6.67     |
| 2-aminobutyrate                                  | Amino acid             | Butanoate metabolism                                         |          | 0.53     |          |
| cysteine                                         | Amino acid             | Cysteine, methionine, SAM, taurine metabolism                | 0.37     |          |          |
| cystine                                          | Amino acid             | Cysteine, methionine, SAM, taurine metabolism                |          | 0.48     |          |
| N-acetylmethionine                               | Amino acid             | Cysteine, methionine, SAM, taurine metabolism                |          |          | 2.63     |
| S-adenosylhomocysteine (SAH)                     | Amino acid             | Cysteine, methionine, SAM, taurine metabolism                | 0.47     |          | 1.96     |
| taurine                                          | Amino acid             | Cysteine, methionine, SAM, taurine metabolism                |          |          | 2.70     |
| gamma-aminobutyrate (GABA)                       | Amino acid             | Glutamate metabolism                                         | 0.43     |          |          |
| N-acetyl-aspartyl-glutamate (NAAG)               | Amino acid             | Glutamate metabolism                                         |          | 0.41     |          |
| betaine                                          | Amino acid             | Glycine, serine and threonine metabolism                     |          |          | 2.38     |
| N-acetylthreonine                                | Amino acid             | Glycine, serine and threonine metabolism                     |          |          | 2.08     |
| serine                                           | Amino acid             | Glycine, serine and threonine metabolism                     | 1.64     |          |          |
| urocanate                                        | Amino acid             | Histidine metabolism                                         | 2.04     |          |          |
| phenylacetylglutamine                            | Amino acid             | Phenylalanine & tyrosine metabolism                          | 0.40     |          |          |
| 5-methylthioadenosine (MTA)                      | Amino acid             | Polyamine metabolism                                         | 2.86     |          |          |
| kynurenine                                       | Amino acid             | Tryptophan metabolism                                        | 2.27     | 2.78     |          |
| tryptophan betaine                               | Amino acid             | Tryptophan metabolism                                        |          |          | 2.04     |
| isobutyrylcarnitine                              | Amino acid             | Valine, leucine and isoleucine metabolism                    | 0.32     |          |          |
| isovalerylcarnitine                              | Amino acid             | Valine, leucine and isoleucine metabolism                    |          | 3.03     |          |
| valerylcarnitine                                 | Amino acid             | Valine, leucine and isoleucine metabolism                    | 5.56     |          |          |
| N-acetylmannosamine                              | Carbohydrate           | Aminosugars metabolism                                       | 0.55     |          |          |
| mannose                                          | Carbohydrate           | Fructose, mannose, galactose, starch, and sucrose metabolism | 0.53     |          |          |
| sorbitol                                         | Carbohydrate           | Fructose, mannose, galactose, starch, and sucrose metabolism | 0.44     |          |          |
| tagatose                                         | Carbohydrate           | Fructose, mannose, galactose, starch, and sucrose metabolism | 0.27     |          |          |
| glucose                                          | Carbohydrate           | Glycolysis, gluconeogenesis, pyruvate metabolism             | 0.49     |          |          |
| glucuronate                                      | Carbohydrate           | Glycolysis, gluconeogenesis, pyruvate metabolism             | 0.35     |          |          |
| Isobar: fructose 1,6-diphosphate, glucose 1,6-   | Carbohydrate           | Glycolysis, gluconeogenesis, pyruvate metabolism             | 2.38     |          |          |
| 6-phosphogluconate                               | Carbohydrate           | Nucleotide sugars, pentose metabolism                        | 0.44     |          |          |
| ribitol                                          | Carbohydrate           | Nucleotide sugars, pentose metabolism                        | 0.42     |          |          |
| ribose 5-phosphate                               | Carbohydrate           | Nucleotide sugars, pentose metabolism                        | 0.45     |          |          |
| UDP-glucose                                      | Carbohydrate           | Nucleotide sugars, pentose metabolism                        | 0.45     |          |          |
| xylitol                                          | Carbohydrate           | Nucleotide sugars, pentose metabolism                        | 0.38     |          |          |
| glucarate (saccharate)                           | Cofactors and vitamins | Ascorbate and aldarate metabolism                            | 0.35     |          |          |
| gulono-1,4-lactone                               | Cofactors and vitamins | Ascorbate and aldarate metabolism                            | 0.29     |          |          |
| nicotinamide                                     | Cofactors and vitamins | Nicotinate and nicotinamide metabolism                       | 0.22     |          |          |
| nicotinamide adenine dinucleotide reduced (NADH) | Cofactors and vitamins | Nicotinate and nicotinamide metabolism                       | 0.34     |          |          |
| nicotinamide ribonucleotide (NMN)                | Cofactors and vitamins | Nicotinate and nicotinamide metabolism                       |          | 0.05     |          |
| nicotinamide riboside*                           | Cofactors and vitamins | Nicotinate and nicotinamide metabolism                       | 0.52     |          |          |
| pantothenate                                     | Cofactors and vitamins | Pantothenate and CoA metabolism                              |          | 0.51     |          |
| phosphopantetheine                               | Cofactors and vitamins | Pantothenate and CoA metabolism                              | 0.44     |          |          |
| flavin adenine dinucleotide (FAD)                | Cofactors and vitamins | Riboflavin metabolism                                        | 0.49     |          |          |
| alpha-tocopherol                                 | Cofactors and vitamins | Tocopherol metabolism                                        | 0.40     |          |          |
| alpha-ketoglutarate                              | Energy                 | Krebs cycle                                                  |          | 2.13     |          |
| fumarate                                         | Energy                 | Krebs cycle                                                  |          | 0.51     |          |
| malate                                           | Energy                 | Krebs cycle                                                  | 0.51     |          |          |
| pyrophosphate (PPi)                              | Energy                 | Oxidative phosphorylation                                    |          |          | 10.00    |
| 2-methylmalonyl carnitine                        | Lipid                  | Carnitine metabolism                                         | 2.33     |          |          |
| 3-dehydrocarnitine*                              | Lipid                  | Carnitine metabolism                                         | 1.85     |          |          |

|                                            |            |                                                                                       |       |      |      |
|--------------------------------------------|------------|---------------------------------------------------------------------------------------|-------|------|------|
| butyrylcarnitine                           | Lipid      | Carnitine metabolism                                                                  | 12.82 | 2.63 |      |
| decanoylcarnitine                          | Lipid      | Carnitine metabolism                                                                  |       | 1.96 |      |
| deoxycarnitine                             | Lipid      | Carnitine metabolism                                                                  | 2.86  |      |      |
| glutaroyl carnitine                        | Lipid      | Carnitine metabolism                                                                  | 0.46  |      |      |
| hexanoylcarnitine                          | Lipid      | Carnitine metabolism                                                                  | 4.76  | 2.70 |      |
| octanoylcarnitine                          | Lipid      | Carnitine metabolism                                                                  |       | 2.13 |      |
| succinylcarnitine                          | Lipid      | Carnitine metabolism                                                                  |       | 0.28 |      |
| docosapentaenoate (n3 DPA; 22:5n3)         | Lipid      | Essential fatty acid                                                                  | 0.53  |      |      |
| eicosapentaenoate (EPA; 20:5n3)            | Lipid      | Essential fatty acid                                                                  | 0.53  |      |      |
| linolenate [alpha or gamma; (18:3n3 or 6)] | Lipid      | Essential fatty acid                                                                  | 0.42  |      |      |
| sedoheptulose-7-phosphate                  | Lipid      | Fatty acid, dicarboxylate                                                             | 0.35  |      |      |
| choline                                    | Lipid      | Glycerolipid metabolism                                                               | 2.27  |      |      |
| glycerol                                   | Lipid      | Glycerolipid metabolism                                                               | 0.43  |      |      |
| glycerol 3-phosphate (G3P)                 | Lipid      | Glycerolipid metabolism                                                               |       | 0.30 |      |
| glycerophosphorylcholine (GPC)             | Lipid      | Glycerolipid metabolism                                                               | 0.31  |      |      |
| phosphoethanolamine                        | Lipid      | Glycerolipid metabolism                                                               | 2.63  |      |      |
| scyllo-inositol                            | Lipid      | Inositol metabolism                                                                   | 0.51  |      |      |
| 3-hydroxybutyrate (BHBA)                   | Lipid      | Ketone bodies                                                                         |       |      | 2.17 |
| adrenate (22:4n6)                          | Lipid      | Long chain fatty acid                                                                 | 1.96  |      |      |
| dihomo-linoleate (20:2n6)                  | Lipid      | Long chain fatty acid                                                                 | 2.08  |      |      |
| docosadienoate (22:2n6)                    | Lipid      | Long chain fatty acid                                                                 | 3.33  |      |      |
| docosapentaenoate (n6 DPA, 22:5n6)         | Lipid      | Long chain fatty acid                                                                 | 2.63  |      |      |
| docosatrienoate (22:3n3)                   | Lipid      | Long chain fatty acid                                                                 | 3.45  | 0.39 |      |
| eicosenoate (20:1n9 or 11)                 | Lipid      | Long chain fatty acid                                                                 | 2.94  |      |      |
| 1-oleoylglycerophosphoethanolamine         | Lipid      | Lysolipid                                                                             |       | 0.48 |      |
| 1-oleoylglycerophosphoinositol*            | Lipid      | Lysolipid                                                                             | 2.17  | 0.38 |      |
| 1-palmitoylglycerophosphoethanolamine      | Lipid      | Lysolipid                                                                             |       | 0.52 |      |
| 2-arachidonoylglycerophosphocholine*       | Lipid      | Lysolipid                                                                             | 0.42  |      |      |
| 2-linoleoylglycerophosphocholine*          | Lipid      | Lysolipid                                                                             | 0.43  |      |      |
| caproate (6:0)                             | Lipid      | Medium chain fatty acid                                                               | 1.69  |      |      |
| phytosphingosine                           | Lipid      | Sphingolipid                                                                          | 0.38  |      |      |
| sphingosine                                | Lipid      | Sphingolipid                                                                          | 0.53  |      |      |
| stearoyl sphingomyelin                     | Lipid      | Sphingolipid                                                                          |       | 0.45 |      |
| 7-beta-hydroxycholesterol                  | Lipid      | Sterol/Steroid                                                                        | 2.22  |      |      |
| squalene                                   | Lipid      | Sterol/Steroid                                                                        | 0.44  |      |      |
| xanthosine                                 | Nucleotide | Purine metabolism, (hypo)xanthine/inosine containing                                  | 0.23  |      |      |
| adenine                                    | Nucleotide | Purine metabolism, adenine containing                                                 | 2.00  |      |      |
| adenosine                                  | Nucleotide | Purine metabolism, adenine containing                                                 | 0.51  |      |      |
| adenosine 2'-monophosphate (2'-AMP)        | Nucleotide | Purine metabolism, adenine containing                                                 | 0.43  |      |      |
| adenosine 3',5'-diphosphate                | Nucleotide | Purine metabolism, adenine containing                                                 | 0.27  |      |      |
| adenosine 5'-monophosphate (AMP)           | Nucleotide | Purine metabolism, adenine containing                                                 | 0.31  |      |      |
| cytidine                                   | Nucleotide | Pyrimidine metabolism, cytidine containing                                            |       | 0.24 |      |
| 3-aminoisobutyrate                         | Nucleotide | Pyrimidine metabolism, thymine containing; Valine, leucine and isoleucine metabolism/ | 3.33  |      |      |
| 5,6-dihydrouracil                          | Nucleotide | Pyrimidine metabolism, uracil containing                                              | 3.85  |      |      |
| beta-alanine                               | Nucleotide | Pyrimidine metabolism, uracil containing                                              | 0.47  |      |      |
| aspartylleucine                            | Peptide    | Dipeptide                                                                             | 0.38  |      | 2.17 |
| glycylleucine                              | Peptide    | Dipeptide                                                                             | 0.50  |      |      |
| lysylleucine                               | Peptide    | Dipeptide                                                                             | 0.52  |      |      |
| prolylleucine                              | Peptide    | Dipeptide                                                                             | 0.51  |      |      |
| gamma-glutamylglutamate                    | Peptide    | g-glutamyl                                                                            | 0.22  |      |      |
| gamma-glutamylglutamine                    | Peptide    | g-glutamyl                                                                            | 0.18  |      |      |
| gamma-glutamylmethionine*                  | Peptide    | g-glutamyl                                                                            | 0.29  |      |      |
| gamma-glutamyltyrosine                     | Peptide    | g-glutamyl                                                                            | 0.54  |      |      |

|                                       |             |                                 |      |      |      |
|---------------------------------------|-------------|---------------------------------|------|------|------|
| <b>cysteine-glutathione disulfide</b> | Peptide     | Glutathione metabolism          | 0.20 |      |      |
| <b>glutathione, oxidized (GSSG)</b>   | Peptide     | Glutathione metabolism          | 0.18 |      |      |
| <b>glutathione, reduced (GSH)</b>     | Peptide     | Glutathione metabolism          | 0.03 |      |      |
| <b>ophthalmate*</b>                   | Peptide     | Glutathione metabolism          | 0.04 |      |      |
| <b>S-methylglutathione</b>            | Peptide     | Glutathione metabolism          | 0.16 |      |      |
| <b>VGAHAGEYGAEALER*</b>               | Peptide     | Polypeptide                     | 0.31 |      |      |
| <b>hippurate</b>                      | Xenobiotics | Benzoate metabolism             | 0.26 |      |      |
| <b>glycerol 2-phosphate</b>           | Xenobiotics | Chemical                        | 0.26 |      |      |
| <b>phenol red</b>                     | Xenobiotics | Chemical                        |      | 2.04 |      |
| <b>ergothioneine</b>                  | Xenobiotics | Plant                           |      |      | 1.85 |
| <b>erythritol</b>                     | Xenobiotics | Sugar, sugar substitute, starch | 0.39 |      |      |
| <b>galacturonate</b>                  | Xenobiotics | Sugar, sugar substitute, starch | 0.38 |      |      |

Abbreviations: FC: Fold Change; T: tumor; NT: nontumor

Red: Abundant in tumor; Blue: Abundant in nontumor

Metabolites in bold are unique
